# Supplementary material for: SORLA regulates endosomal trafficking and oncogenic fitness of HER2
Source: PubMed Central journal article supplement (PMC6538630; doi:10.1038/s41467-019-10275-0), 2019-05-28
Supplement: 41467_2019_10275_MOESM1_ESM.pdf [file 41467_2019_10275_MOESM1_ESM.pdf]

## **SORLA regulates endosomal trafficking and oncogenic fitness of HER2**

### **Supplementary information:**

- Supplementary Figures 1-8 and associated legends
- Supplementary Table 1. Antibodies used in this study
- Supplementary Table 2. Oligonucleotide sequences of siRNA and shRNA used in this study

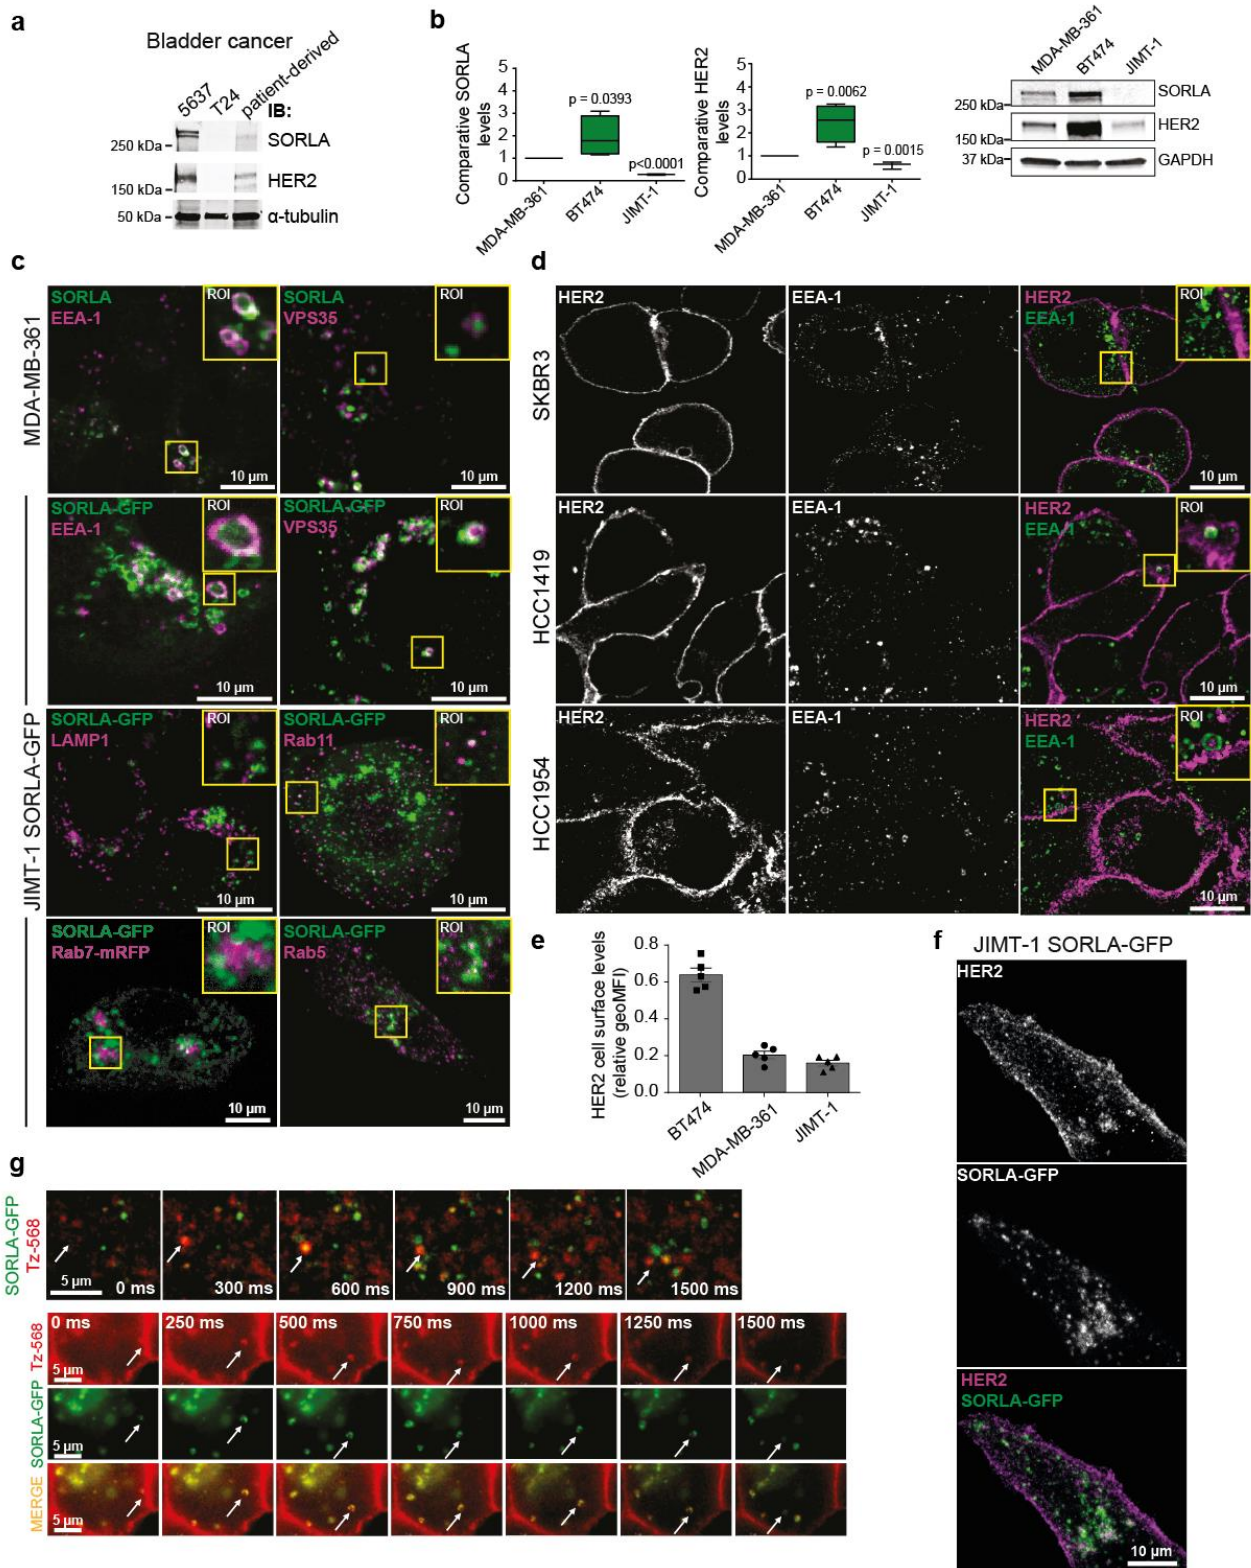

**Supplementary Figure 1.** (a) Western blot analysis of SORLA and HER2 levels in bladder cancer cell lines (5637 and T24) and a patient-derived cell culture.  $\alpha$ -tubulin is a loading control. (b) Representative western blots and quantification of total SORLA and HER2 protein levels in the indicated cell lines. GAPDH was blotted for control for loading. MDA-MB-361 (n=4), BT474 (n=4) and JIMT-1 (n=3). Values are normalized to MDA-MB-361 levels (data are mean  $\pm$  s.d., unpaired Student's *t*-test). (c) Confocal microscopy imaging of endogenous SORLA or SORLA-GFP (green) with endogenous EEA1, VPS35,

LAMP1, Rab11, Rab5 (magenta) or Rab7-mRFP (magenta; Rab7 was overexpressed due to lack of reliable Rab7 antibodies for staining) in MDA-MB-361 (top panel) or JIMT-1 cells. **(d)** Endogenous HER2 (magenta) and EEA1 (green) staining in SKBR3, HCC1419 and HCC1954 cells. **(e)** Flow cytometry analysis of HER2 cell-surface levels in BT474, MDA-MB-361, and JIMT-1 cells ( $n = 5$  from 4 independent experiments). **(f)** Co-localization between SORLA-GFP and HER2 in JIMT-1 cells (Pearson's  $R = 0.3 \pm 0.01$ ,  $n = 130$  cells from 7 independent experiments). Details of colocalization analysis can be found in the methods section. **(g)** Live-cell TIRF imaging (top panel) and confocal imaging (bottom panel) of AlexaFluor-568-labelled trastuzumab (Tz-568; red) and SORLA-GFP (green) in MDA-MB-361 cells.

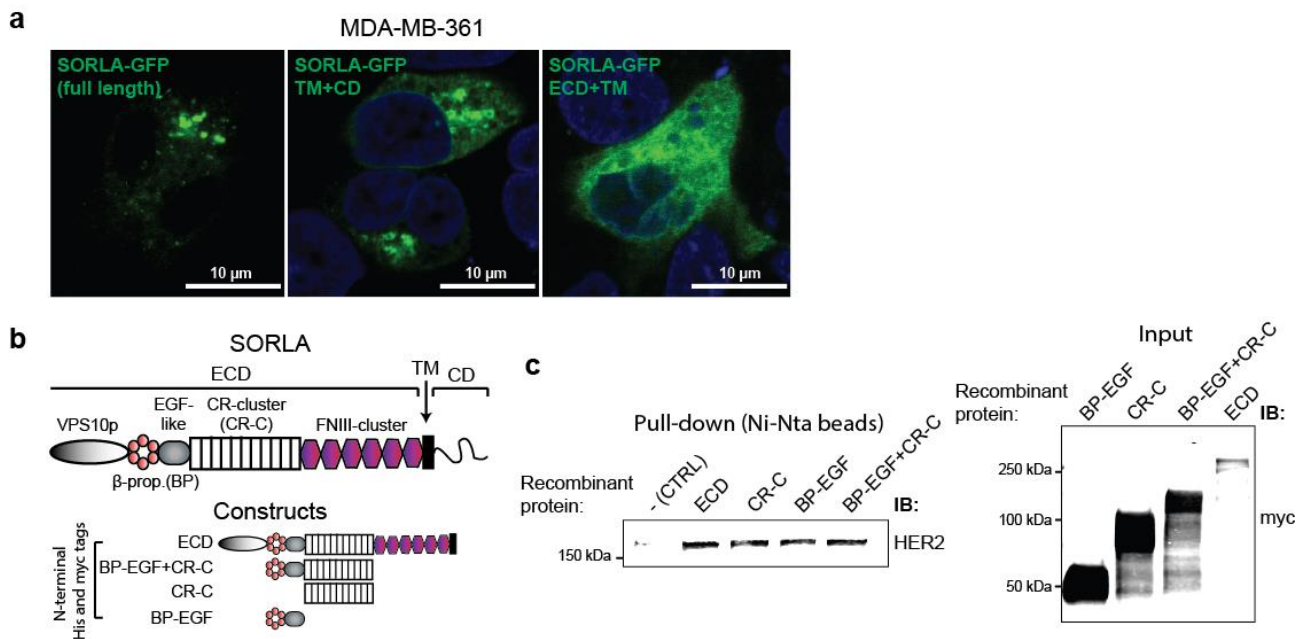

**Supplementary Figure 2.** (a) Confocal imaging of different SORLA-GFP fusion proteins in MDA-MB-361 cells. ECD: extracellular domain; TM: transmembrane domain; CD: cytosolic domain. (b) Schematic of the SORLA protein domains and summary of the constructs used. (c) Pull-down of endogenous HER2 from BT474 cell lysate with His-tagged ECD fragments of SORLA (from b) captured on Ni-Nta beads (left panel). Input of purified ECD fragments recognized with a myc antibody are also shown (right panel).

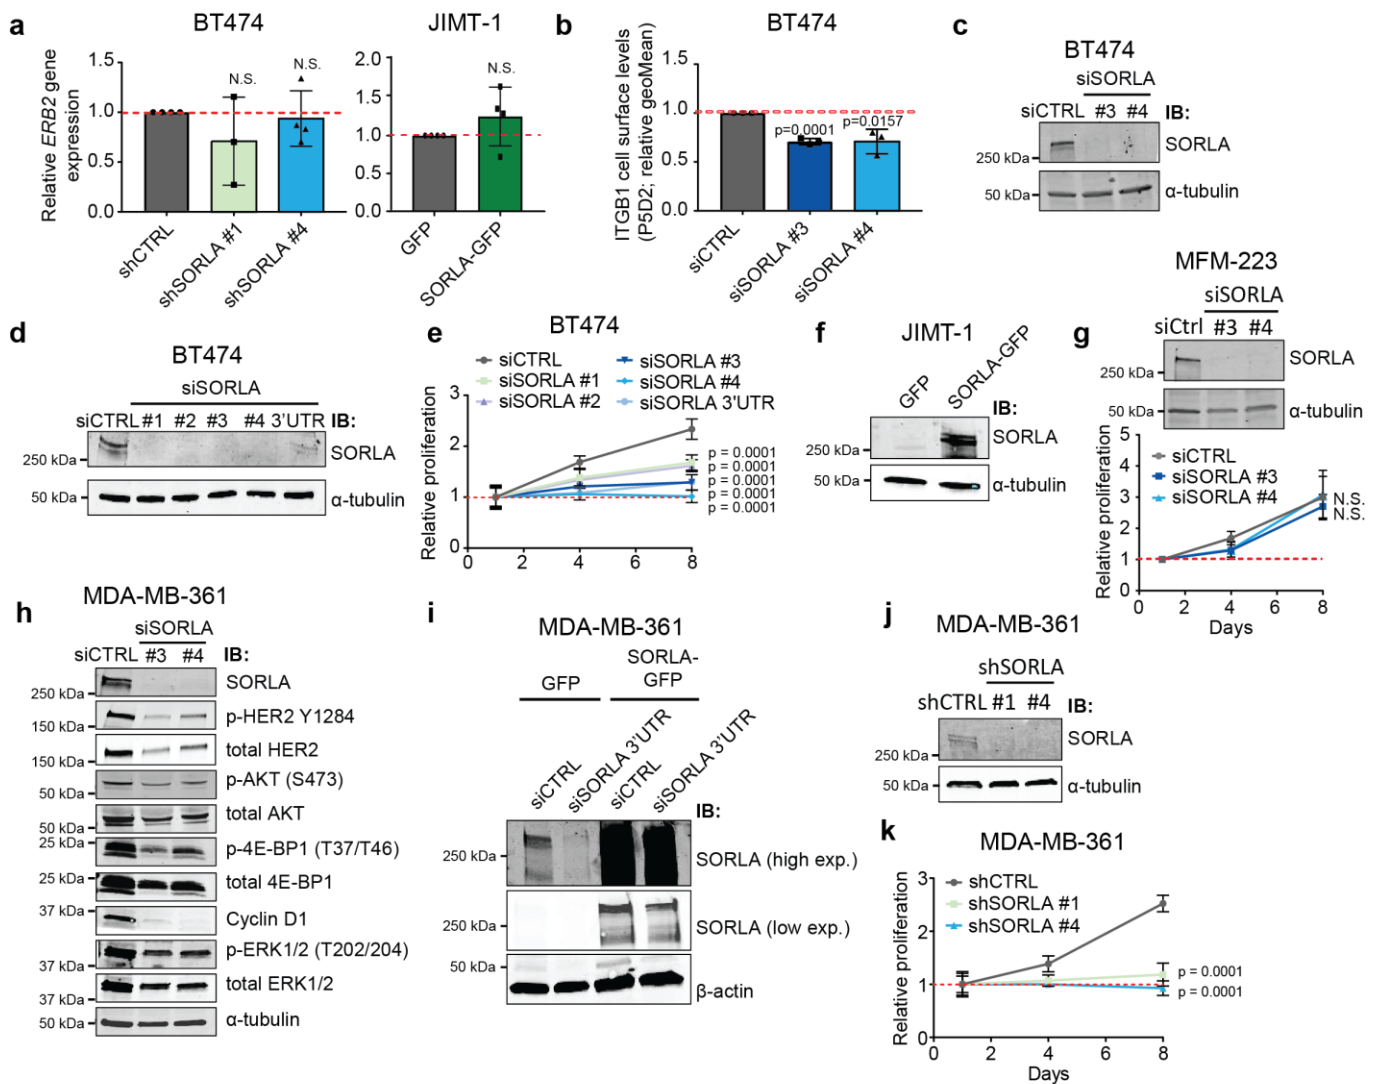

**Supplementary Figure 3.** (a) Quantitative real-time PCR analysis of *ErbB2* mRNA gene expression level in the indicated transfectants. Data are mean  $\pm$  s.d. ( $n = 4$  independent experiments; statistical analysis: unpaired Student's *t*-test). (b) Flow cytometry analysis of ITGB1 levels on the cell surface (detected with P5D2 antibody) in BT474 cells after silencing with control (siCTRL) and SORLA (siSORLA #3 and #4) siRNAs (mean  $\pm$  s.d. of  $n = 3$  independent experiments; statistical analysis: unpaired Student's *t*-test). (c-d) Western blot analysis of SORLA in scramble (siCTRL) and SORLA (siSORLA #1, siSORLA #2, siSORLA #3, siSORLA #4 and siRNA targeting the SORLA 3'UTR, siSORLA 3'UTR) silenced BT474 cells.  $\alpha$ -tubulin is a loading control. (e) Proliferation of BT474 cells after SORLA silencing as in (d). Data are mean  $\pm$  s.d. ( $n = 4$  independent experiments; statistical analysis: two-way ANOVA). (f) Western blot analysis of SORLA in JIMT-1-GFP and JIMT-1-SORLA-GFP cells.  $\alpha$ -tubulin is a loading control. (g) Proliferation of scramble (siCTRL) and siSORLA (siSORLA#3, siSORLA#4) silenced non-HER2-amplified MFM-223 breast cancer cells. Proliferation data are mean  $\pm$  s.d. ( $n = 12$  (4 replicates, 3 independent experiments); statistical analysis: two-way ANOVA). (h) Western blot analysis of the indicated signalling proteins (phosphorylated and total) in MDA-MB-361 cells after scramble (siCTRL)

and SORLA silencing (siSORLA #3 and siSORLA #4),  $\alpha$ -tubulin is a loading control. Shown are representative immunoblots from  $n = 2$  independent experiments. **(i)** Western blot analysis of SORLA in scramble (siCTRL) and SORLA (siSORLA 3'UTR) silenced MDA-MB-361-GFP and MDA-MB-361-SORLA-GFP cells. Shown are two exposures for SORLA.  $\beta$ -actin is a loading control. **(j)** Western blot analysis of SORLA in scramble (siCTRL) and shSORLA (shSORLA #1, shSORLA #4) silenced MDA-MB-361 cells.  $\alpha$ -tubulin is a loading control. **(k)** Proliferation of MDA-MB-361 shRNA cells silenced as in **(j)**. Data are mean  $\pm$  s.d. ( $n = 4$  independent experiments; statistical analysis: two-way ANOVA).

IB: immunoblotting; high exp: high exposure; low exp: low exposure.

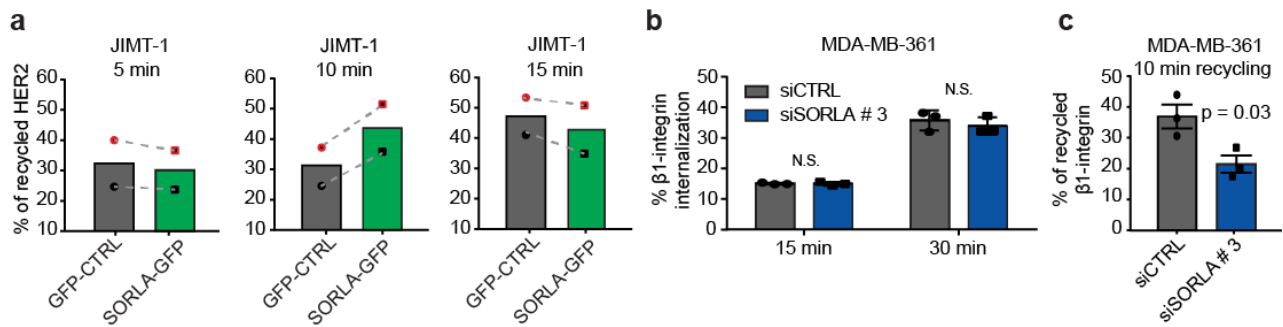

**Supplemental Figure 4.** (a) ELISA-based immunoassay analysis of biotin-labelled cell-surface HER2 recycling at 5 min, 10 min and 15 min (30 min endocytosis) in JIMT-1 cells with two different capture antibodies: red points (trastuzumab, Herceptin), black points (c-erbB-2 A0485), bars average of the two. (b) ELISA-based immunoassay analysis of biotin-labelled cell-surface  $\beta 1$  integrin (9EG7) internalization after 15 min and 30 min in MDA-MB-361 cells treated with scramble (siCTRL) and SORLA (siSORLA) siRNAs for 72 h (data are mean  $\pm$  s.d.;  $n = 3$  independent experiments; statistical analysis: unpaired Student's  $t$ -test). (c) ELISA-based immunoassay analysis of biotin-labelled cell-surface  $\beta 1$  integrin recycling after 10 min (30 min endocytosis) in MDA-MB-361 cells treated with scramble (siCTRL) and SORLA (siSORLA) siRNAs for 72 h (data are mean  $\pm$  s.d.;  $n = 3$  independent experiments; statistical analysis: unpaired Student's  $t$ -test).

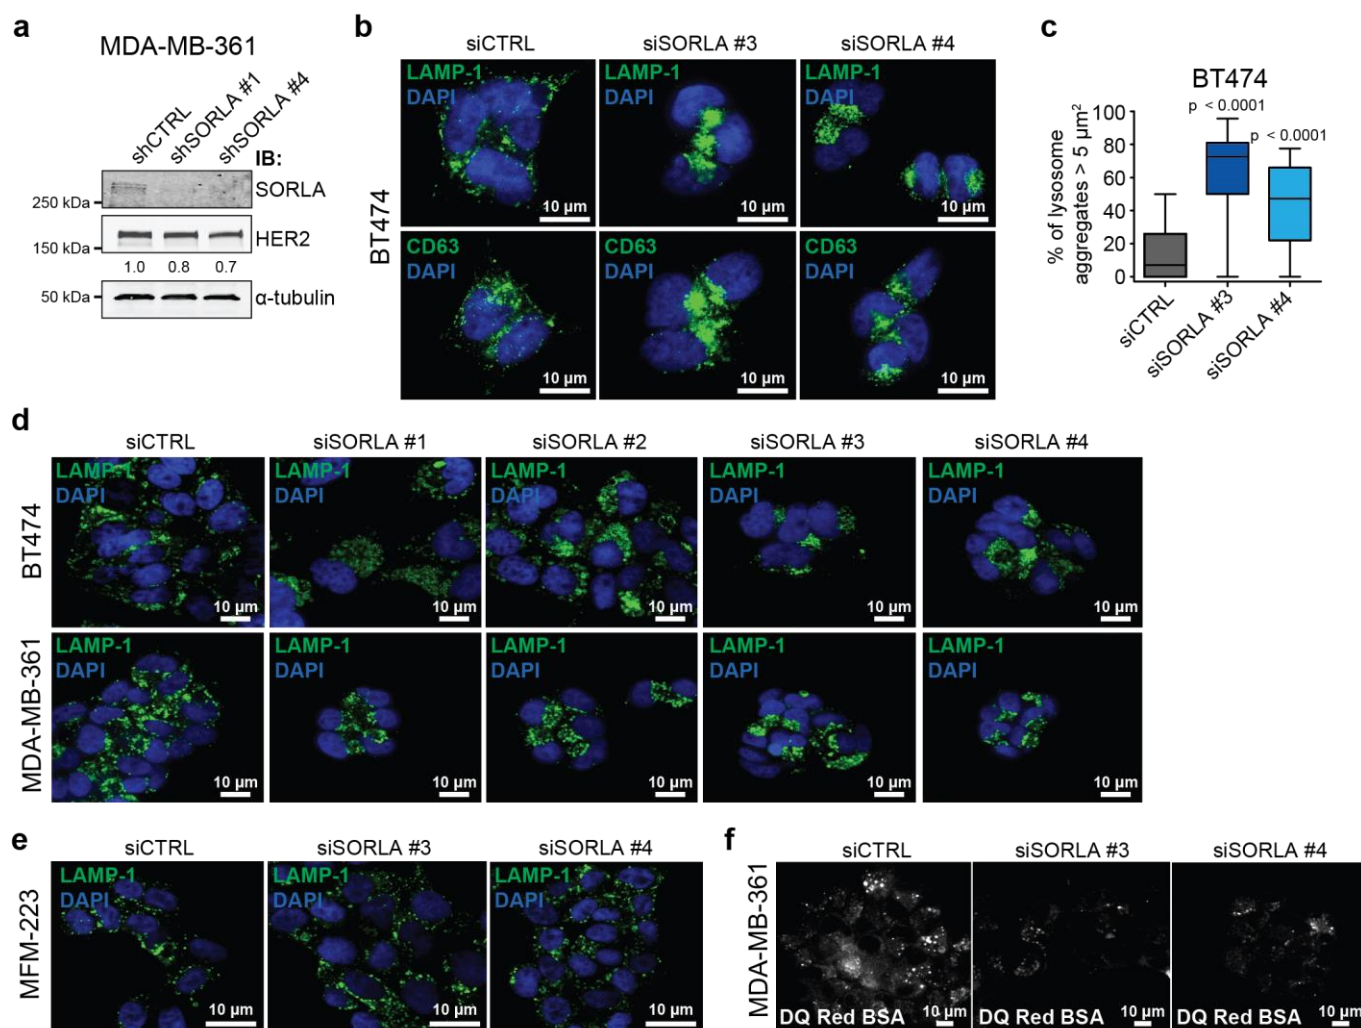

**Supplementary Figure 5.** (a) Western blot analysis of SORLA and HER2 levels in scramble (shCTRL) and shSORLA (shSORLA #1, shSORLA #4) silenced MDA-MB-361 cells.  $\alpha$ -tubulin is a loading control. Numbers are HER2 levels relative to CTRL. (b) Confocal microscopy images of LAMP1, CD63 and DAPI (for nucleus) in scramble (siCTRL) and siSORLA (siSORLA#3, siSORLA#4) silenced BT474 cells. (c) Quantification of late-endosomes/lysosome aggregation after SORLA silencing in BT474 cells (performed only from LAMP1 staining). LAMP1-positive structures  $\geq 5 \mu\text{m}^2$  were considered as lysosome aggregates. Data are displayed as box plots (n = 32 siCTRL, 35 siSORLA #3 and 24 siSORLA #4 cells, three independent experiments; statistical analysis: Mann-Whitney test). (d) Confocal microscopy images of LAMP1 and DAPI (for nucleus) in scramble (siCTRL) and siSORLA (siSORLA #1, siSORLA #2, siSORLA#3, siSORLA#4) silenced BT474 and MDA-MB-361 cells. (e) Confocal microscopy images of LAMP1 and DAPI in scramble (siCTRL) and siSORLA (siSORLA#3, siSORLA#4) silenced non-HER2-amplified MFM-223 breast cancer cells. (f) Microscopy images of DQ Red BSA degradation (loss of quenching) in 48 h BSA-loaded MDA-MB-361 cells after scramble (siCTRL) or SORLA (siSORLA #3 and siSORLA #4) silencing.



**a**

Table I. SORLA and EGFR expression correlation in bladder cancer TMA

|           | EGFR (0)  | EGFR (1)  | EGFR (2)  | EGFR (3) |
|-----------|-----------|-----------|-----------|----------|
| SORLA (0) | 19 (42 %) | 17 (38 %) | 8 (18 %)  | 1 (2 %)  |
| SORLA (1) | 10 (20 %) | 27 (53 %) | 13 (25 %) | 1 (2 %)  |
| SORLA (2) | 14 (22 %) | 32 (51 %) | 16 (25 %) | 1 (2 %)  |

Chi-square test,  $p = 0.226$ **b**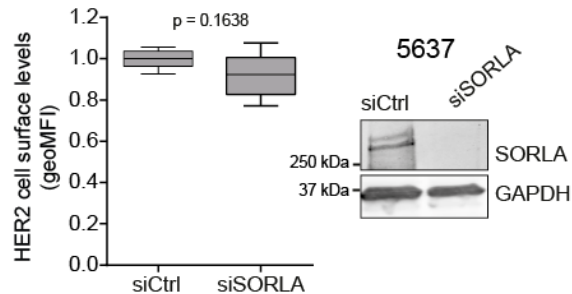**c**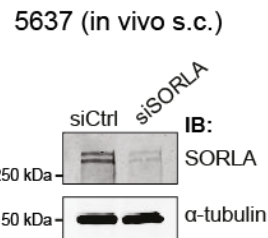**d**

Table II. TCGA analysis of correlation between SORLA and HER2 in different cancer types

| Cancer type                                                      | Pearson correlation coefficient | P-value    |
|------------------------------------------------------------------|---------------------------------|------------|
| Testicular germ cell tumors                                      | 0.442                           | 8.68E - 08 |
| Cervical squamous cell carcinoma and endocervical adenocarcinoma | 0.139                           | 0.0155     |
| Kidney Renal clear cell carcinoma                                | 0.322                           | 2.67E - 14 |
| Sarcoma                                                          | 0.352                           | 5.83E - 09 |
| Thymoma                                                          | 0.587                           | 1.78E - 12 |

**Supplementary Figure 6.** (a) Correlation analyses of SORLA and EGFR expression in bladder cancer TMA material. Numbers indicate staining intensity, 0=negative. (b) Flow cytometry analysis of HER2 levels on the cell surface in 5637 cells after silencing with control (siCTRL) and SORLA (siSORLA) siRNAs (mean  $\pm$  s.d. of  $n = 3$  independent experiments; statistical analysis: unpaired Student's *t*-test). (c) Western blot analysis of SORLA levels in scramble (siCTRL) and siSORLA (siSORLA#3) silenced 5637 bladder cancer cells used in the *in vivo* xenograft assay in Fig. 6d, e.  $\alpha$ -tubulin is a loading control. (d) Correlation between SORLA and HER2 expression in different neoplasms based on TCGA data.

Figure 1a

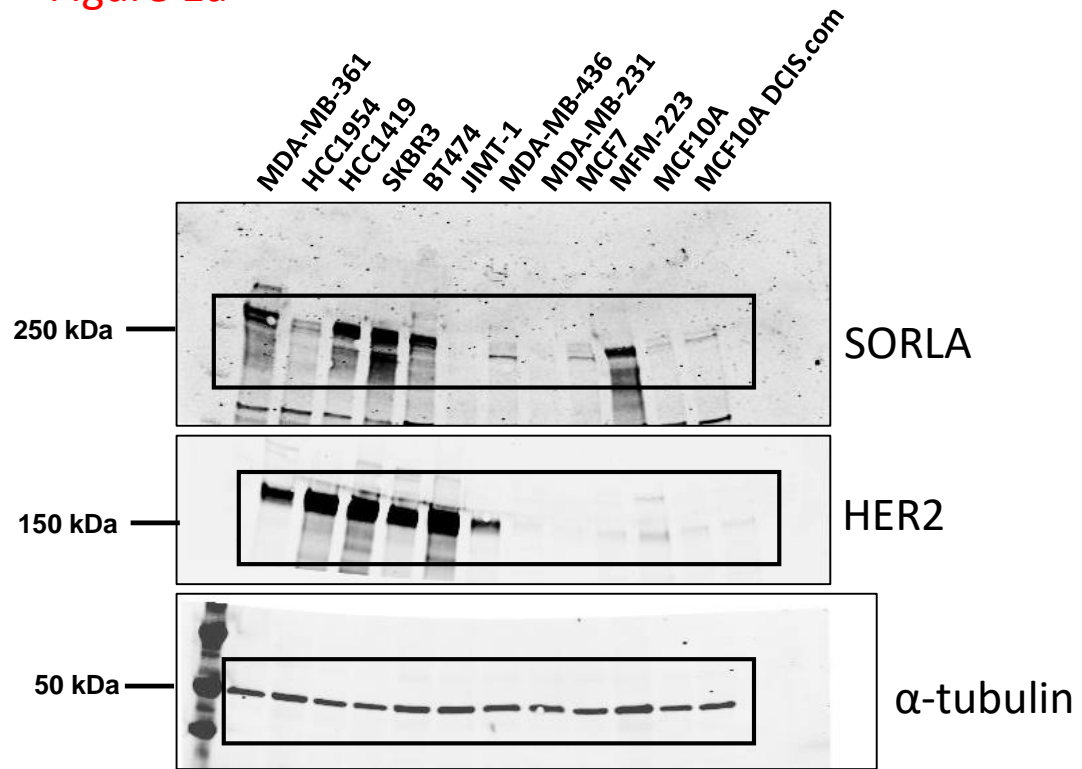

Figure 1e

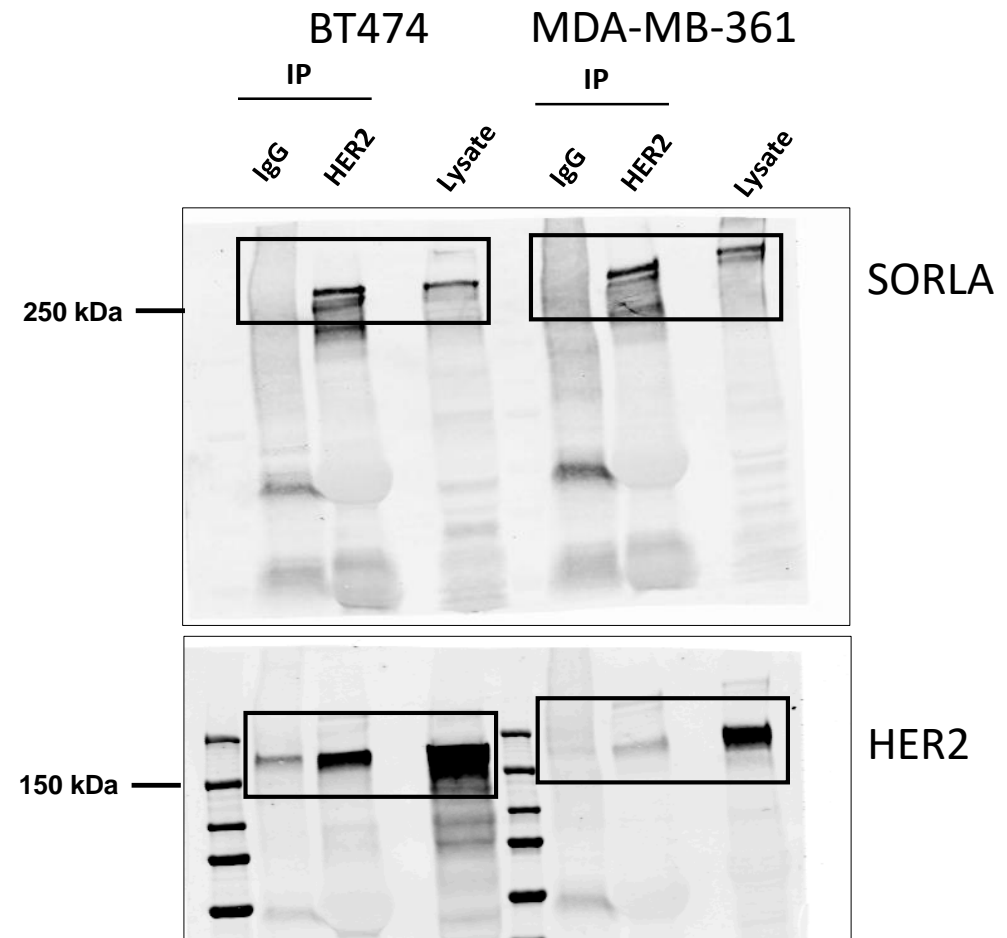

Figure 1g

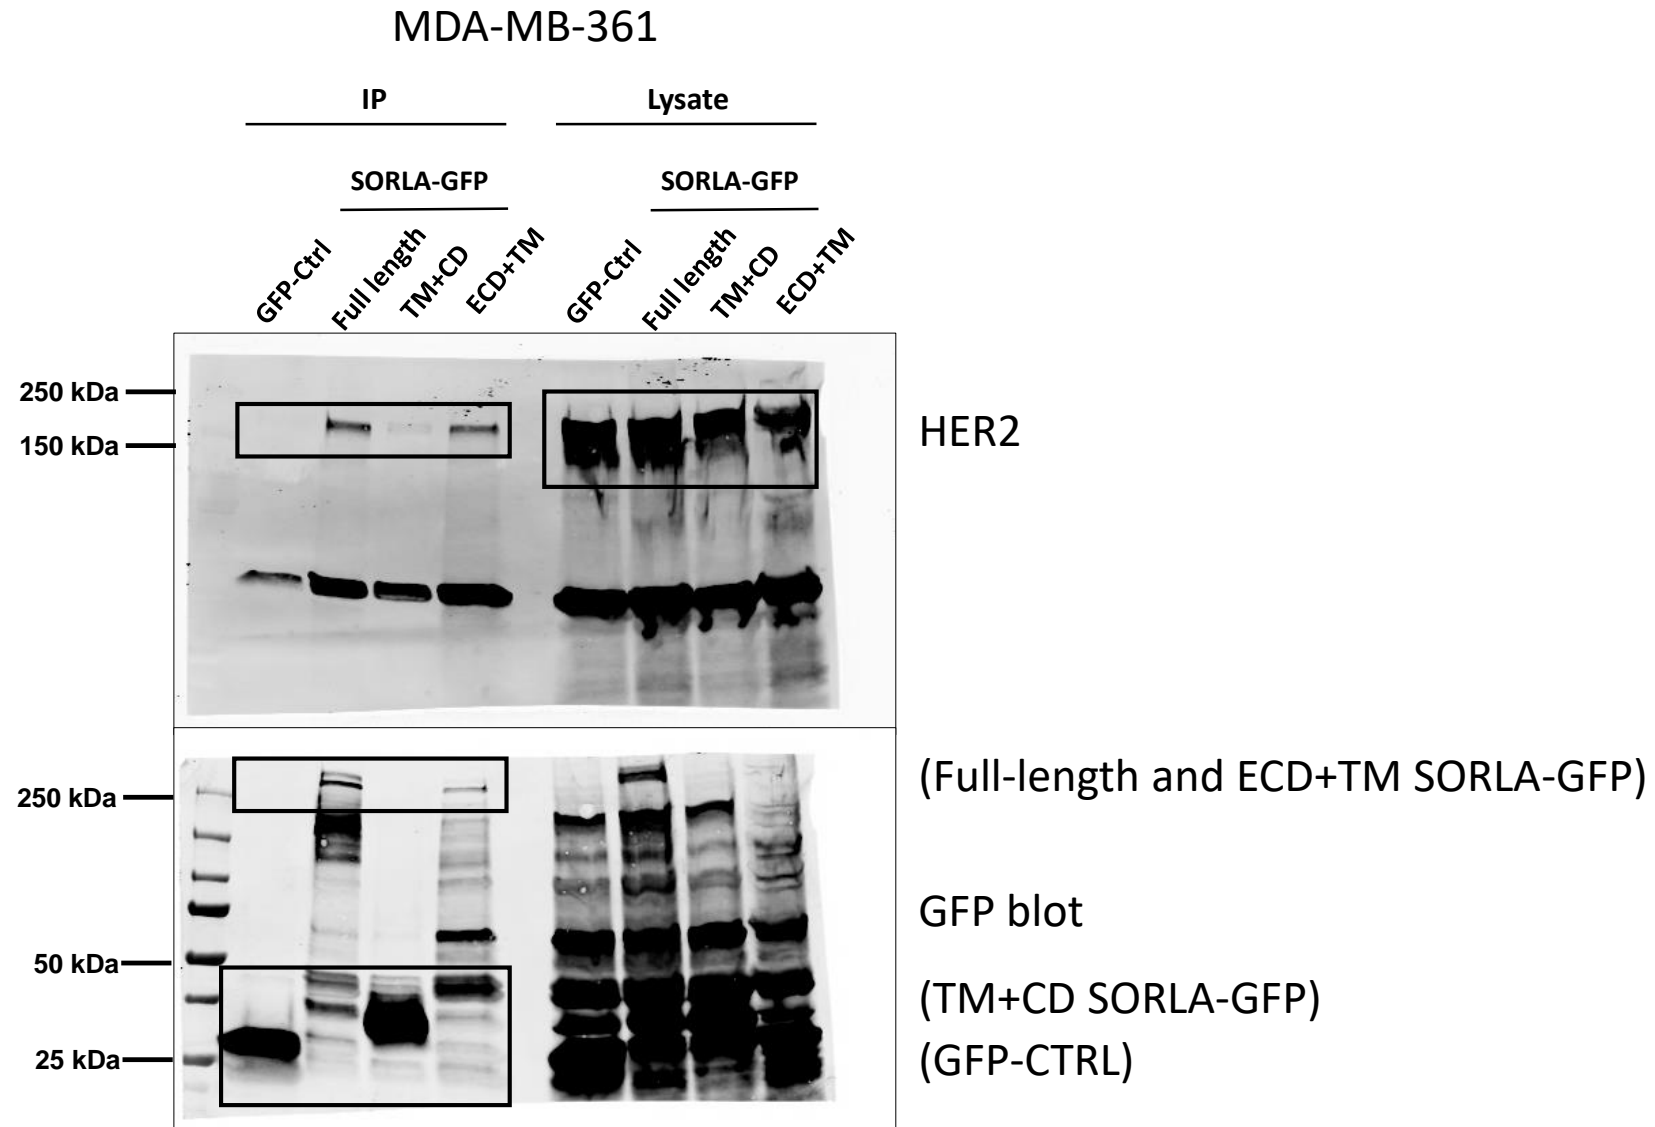

Figure 2c

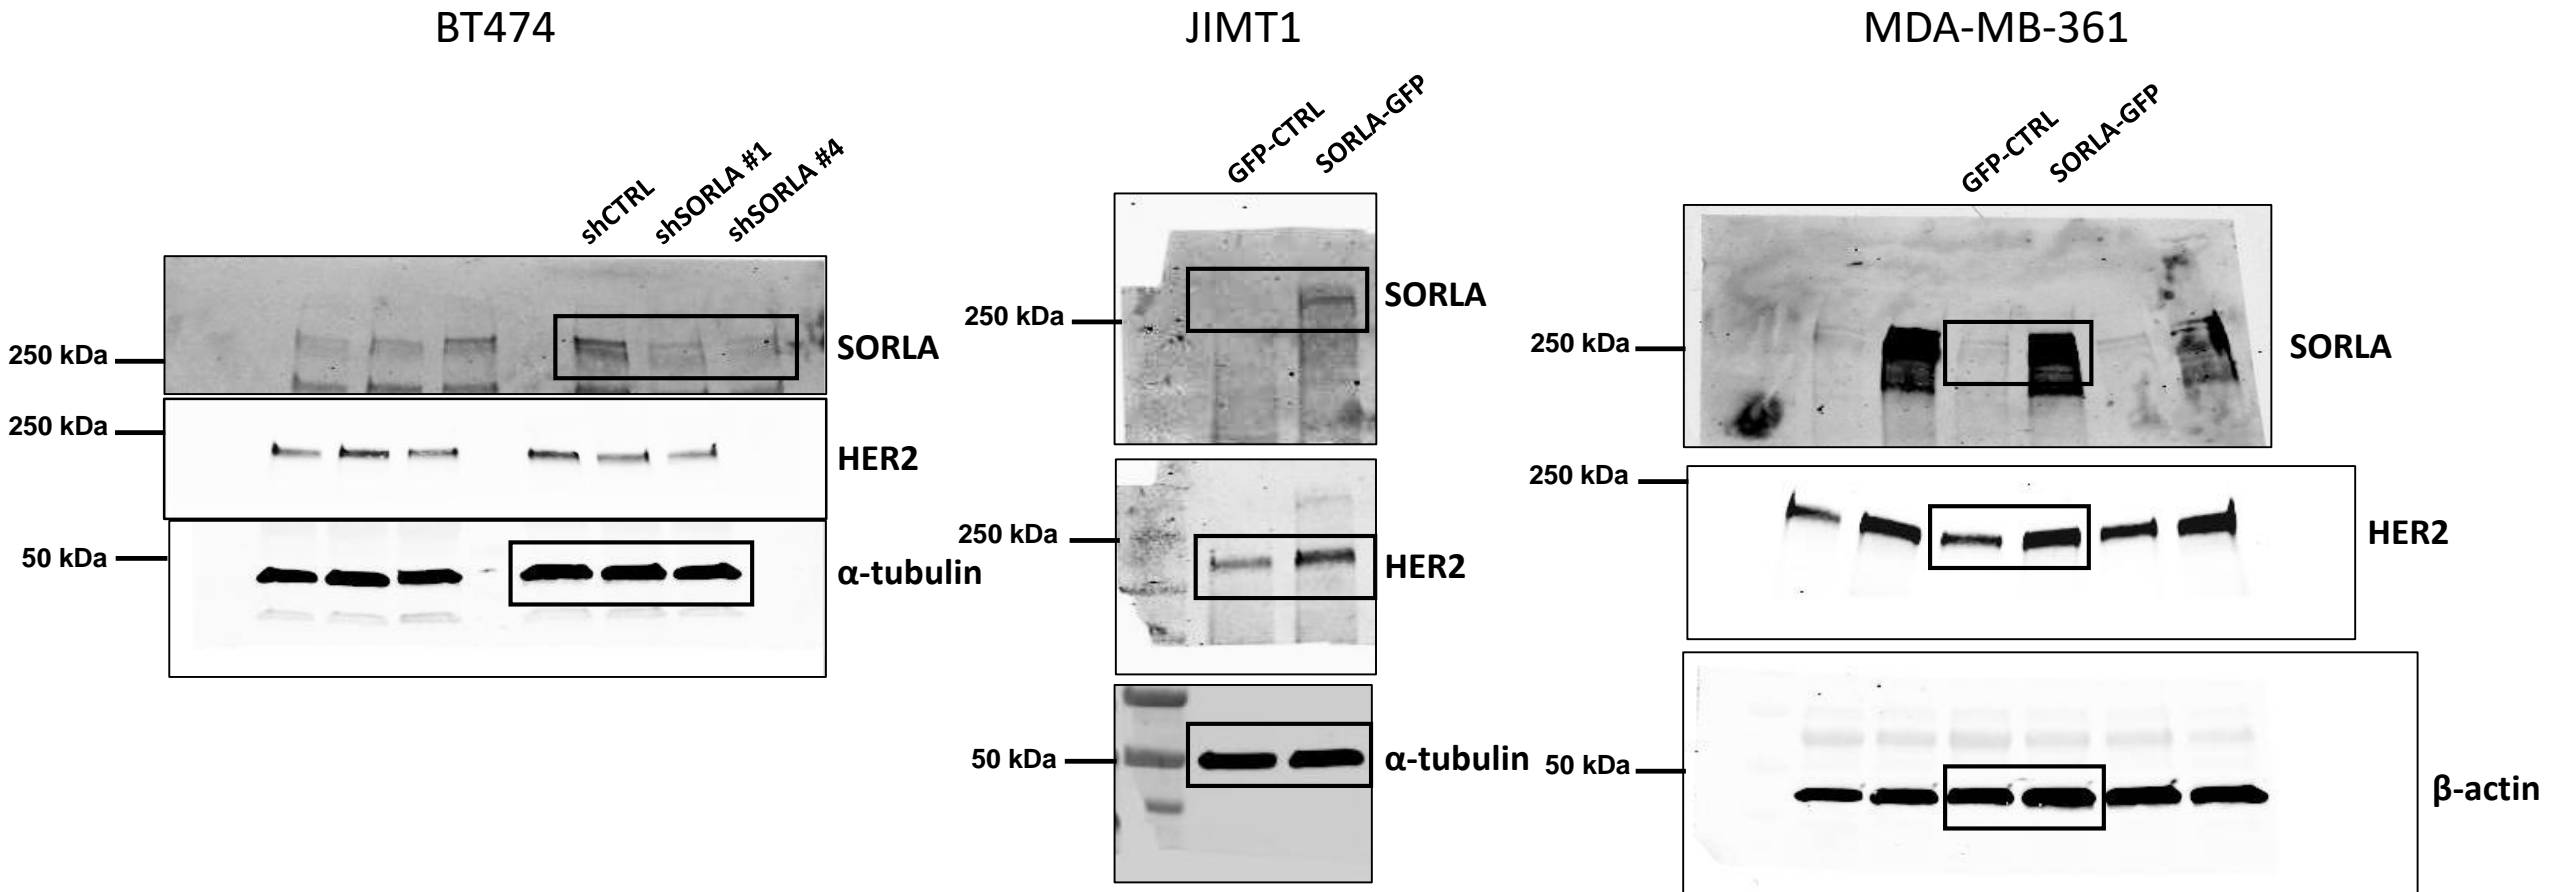

Figure 2f

BT474 cells

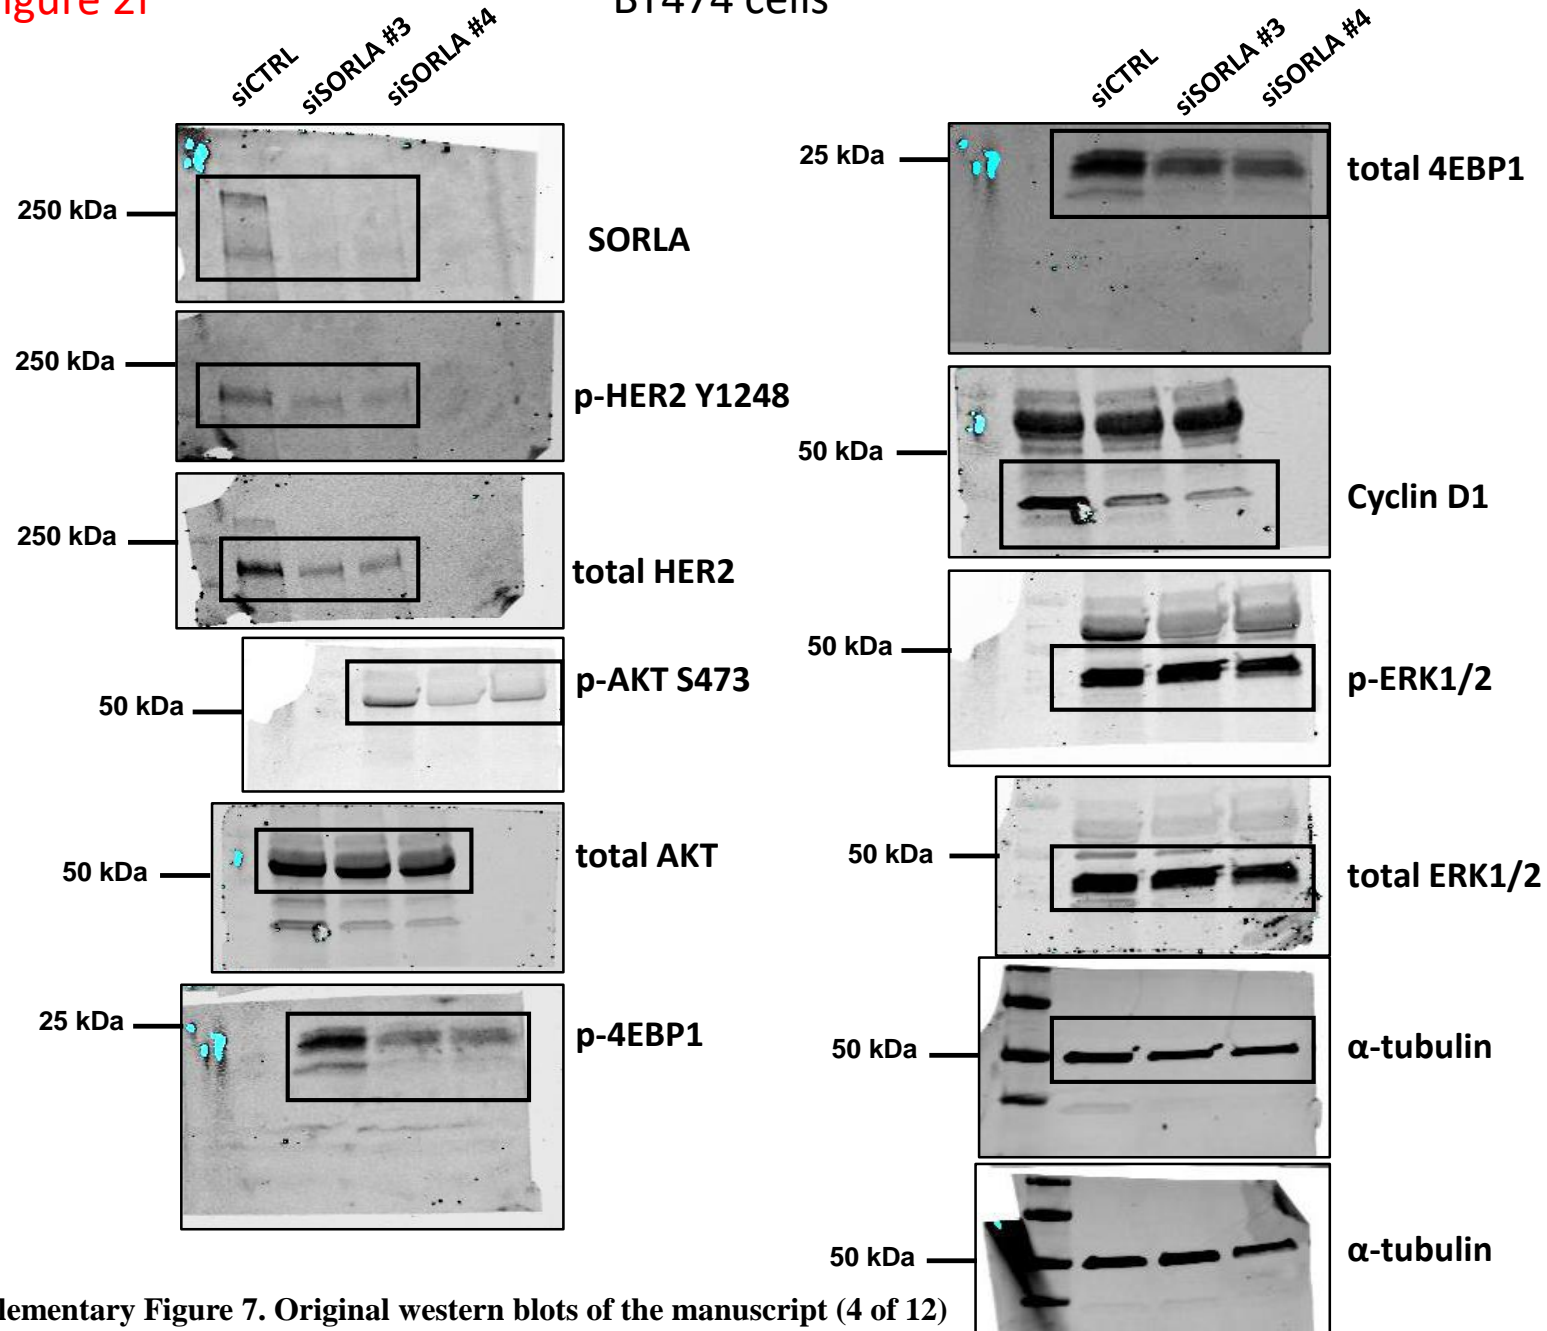

Figure 3h

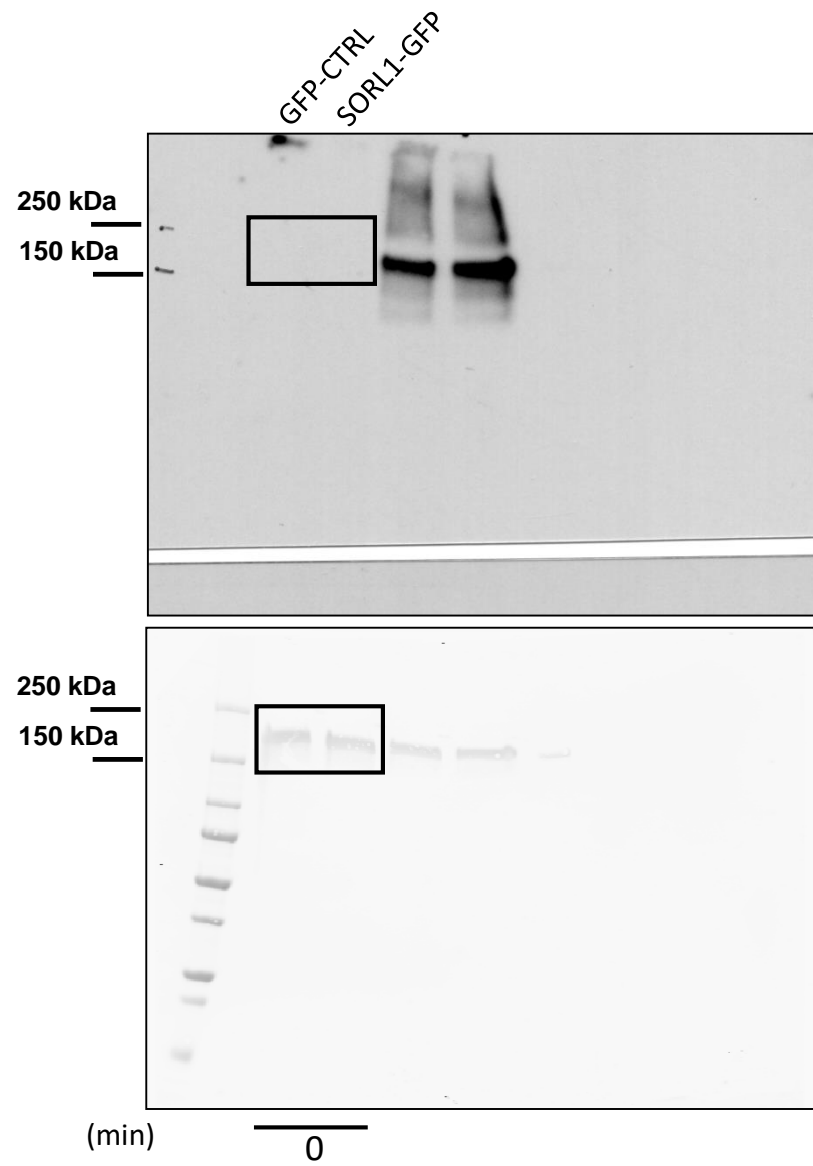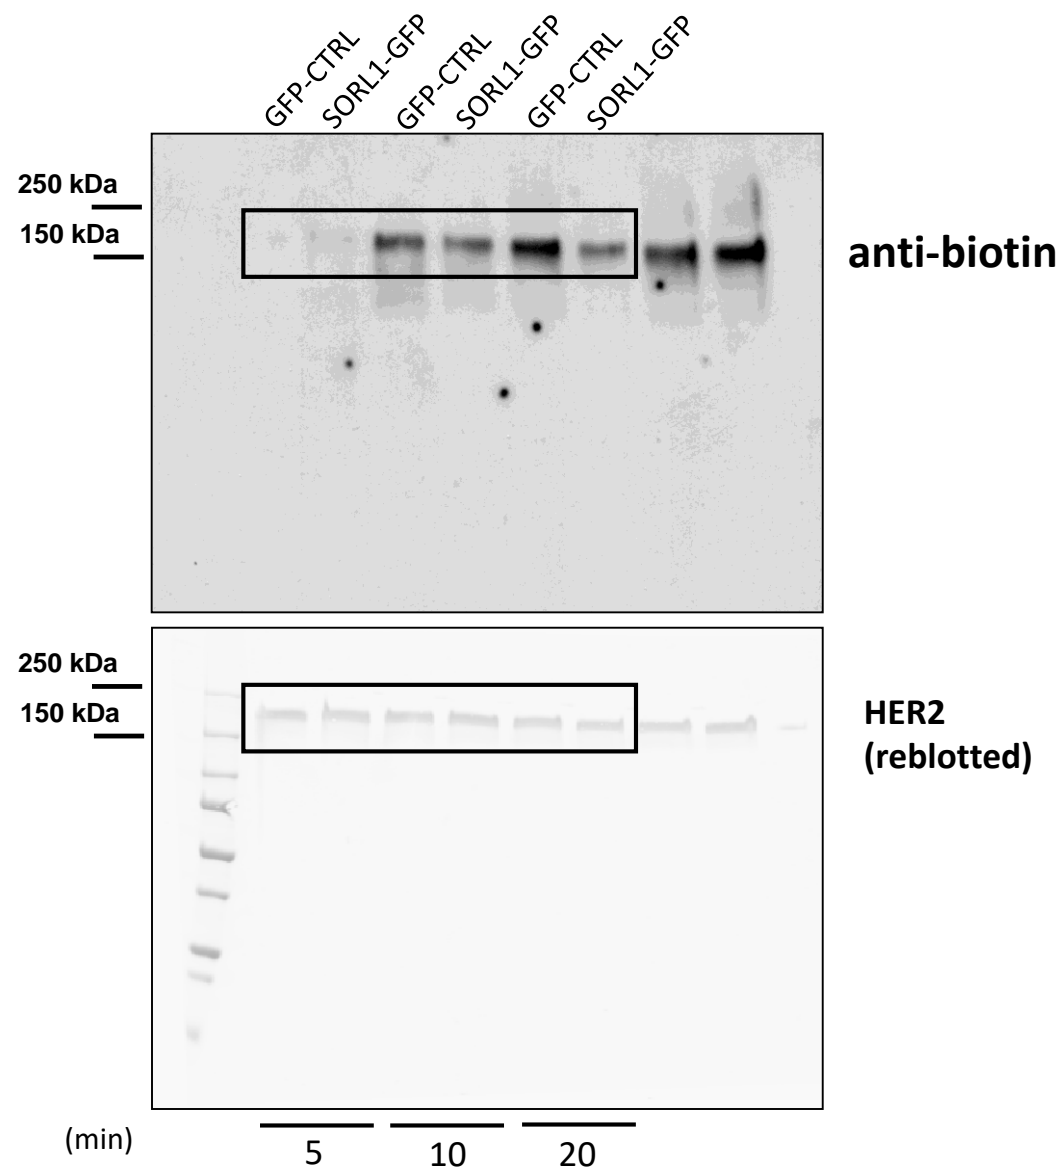

Figure 4h

DMSO      Ebastine (15  $\mu$ M, 48h)

MDA-MB-361

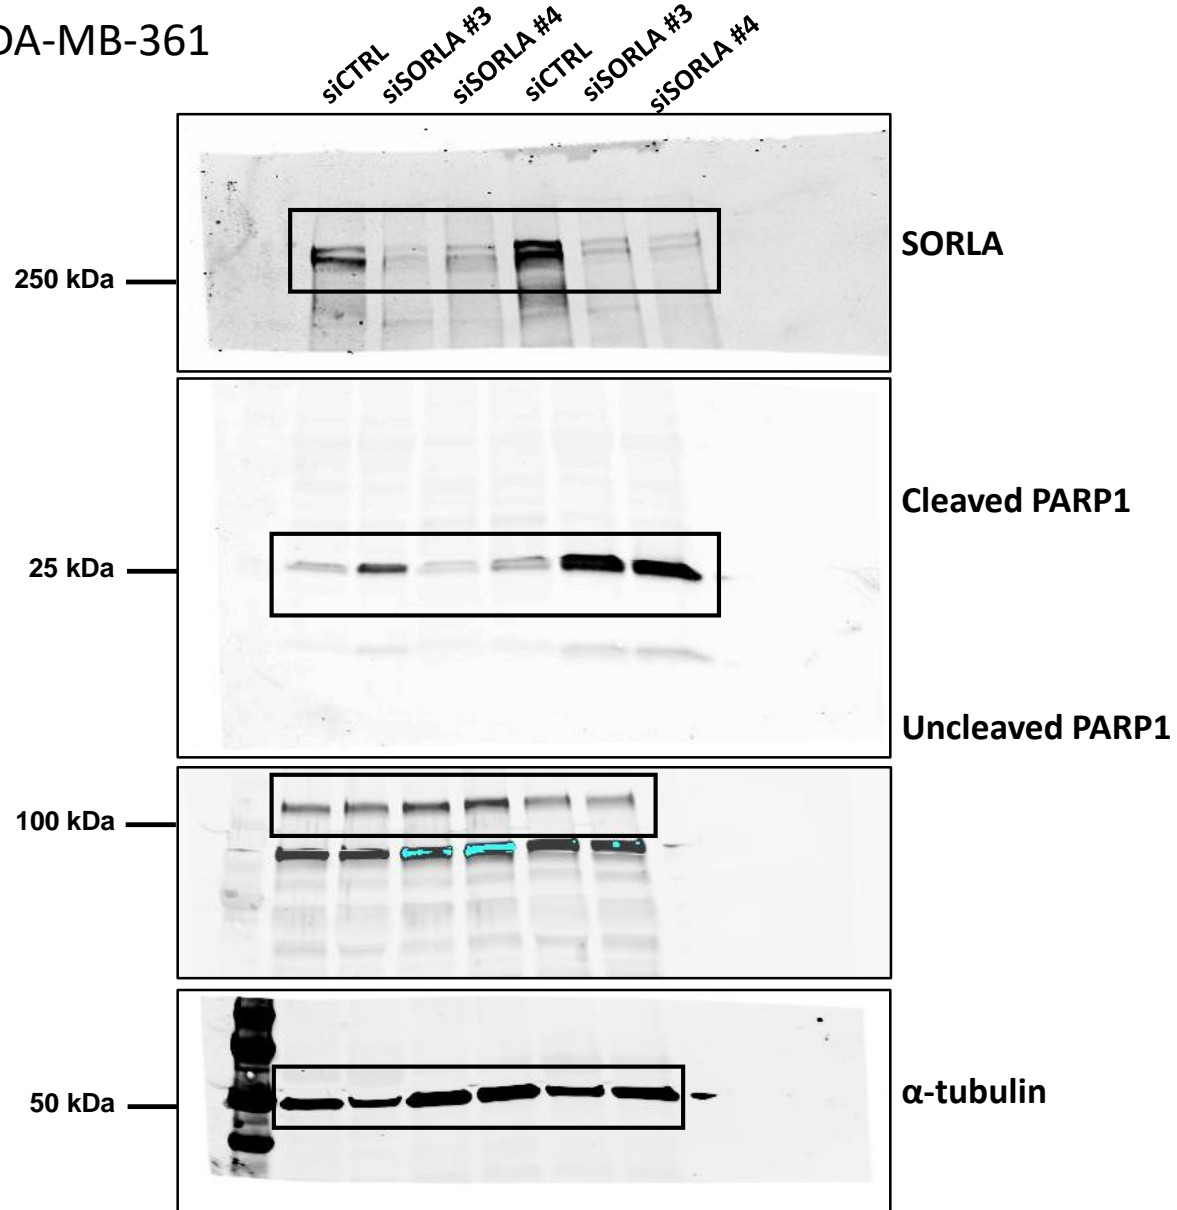

Figure 6b

5637

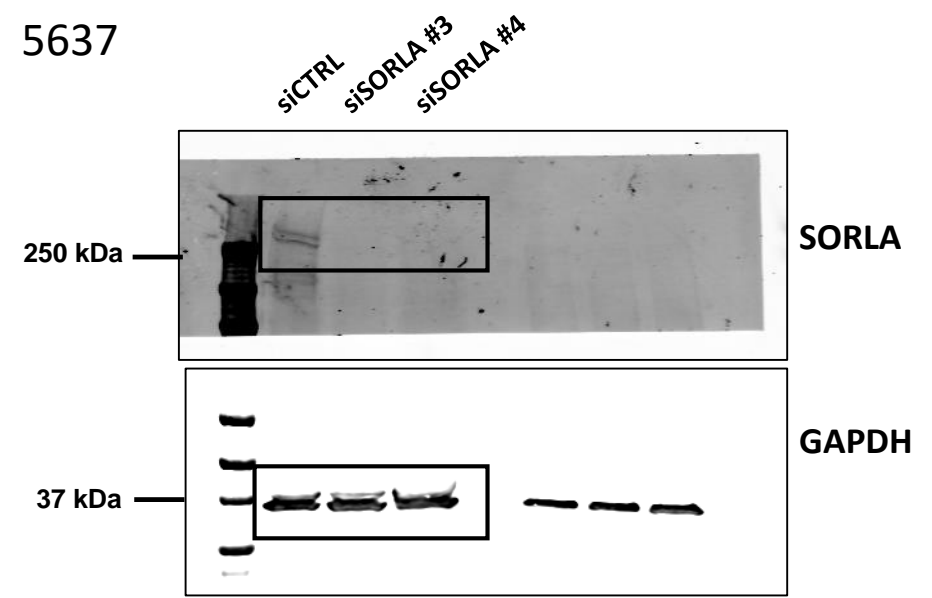

Supplemental figure 1a

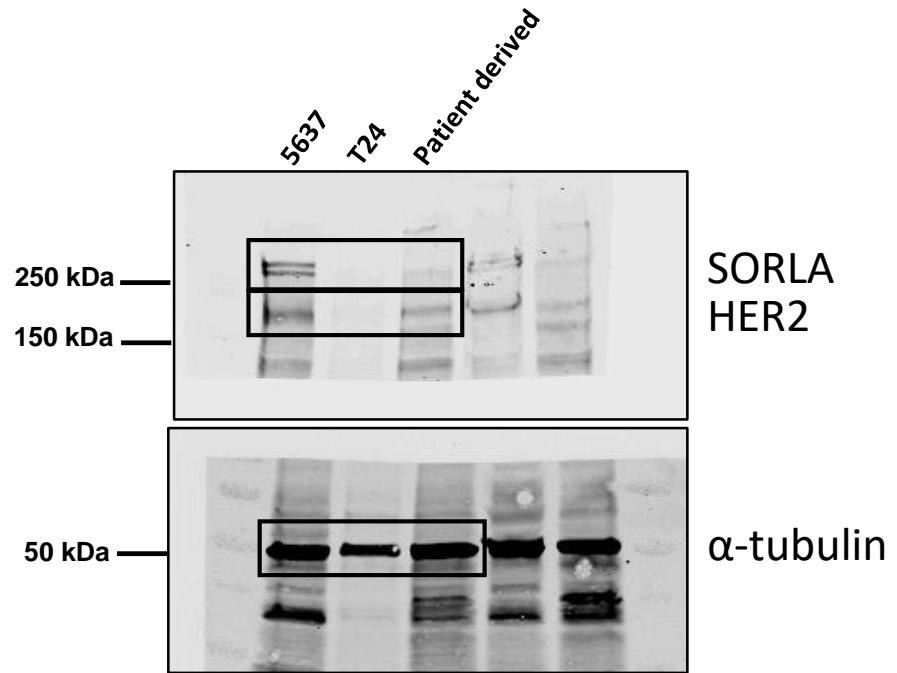

Supplemental figure 1b

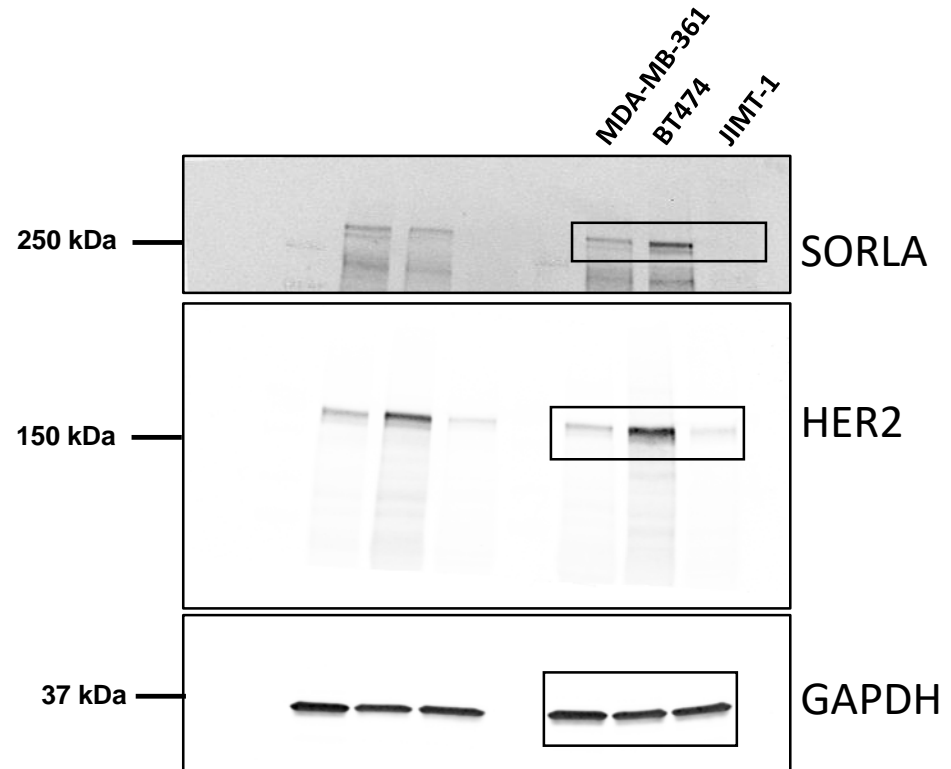



Supplementary Figure 2c

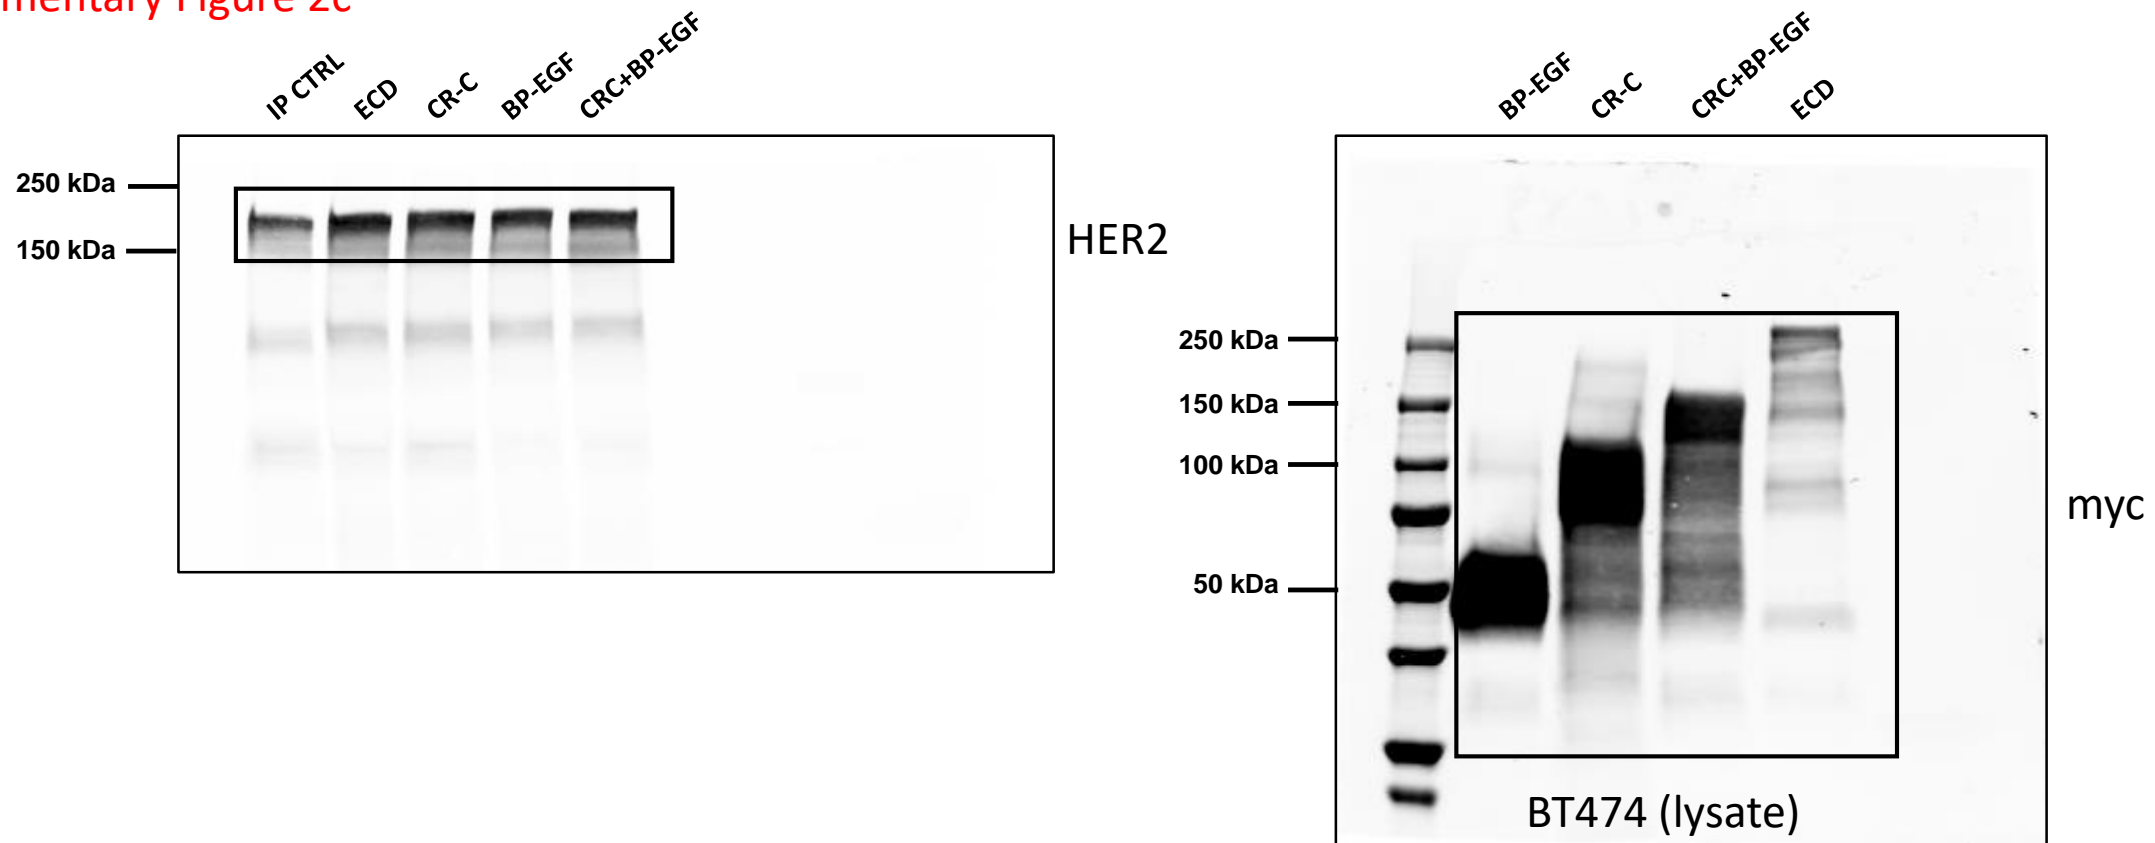

Supplementary Figure 3c and 3g

MFM-223 (3g)

BT474 (3c)

siCTRL  
siSORLA #3  
siSORLA #4

siCTRL  
siSORLA #3  
siSORLA #4

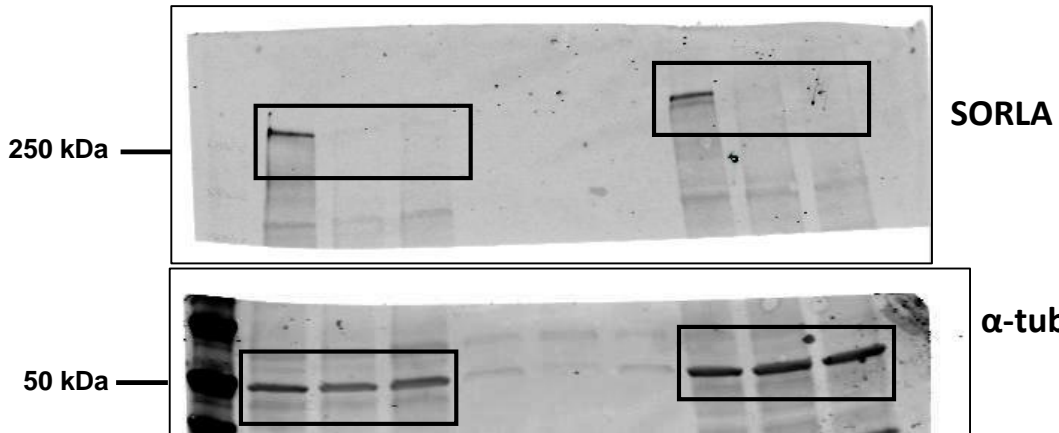

Supplementary Figure 3d

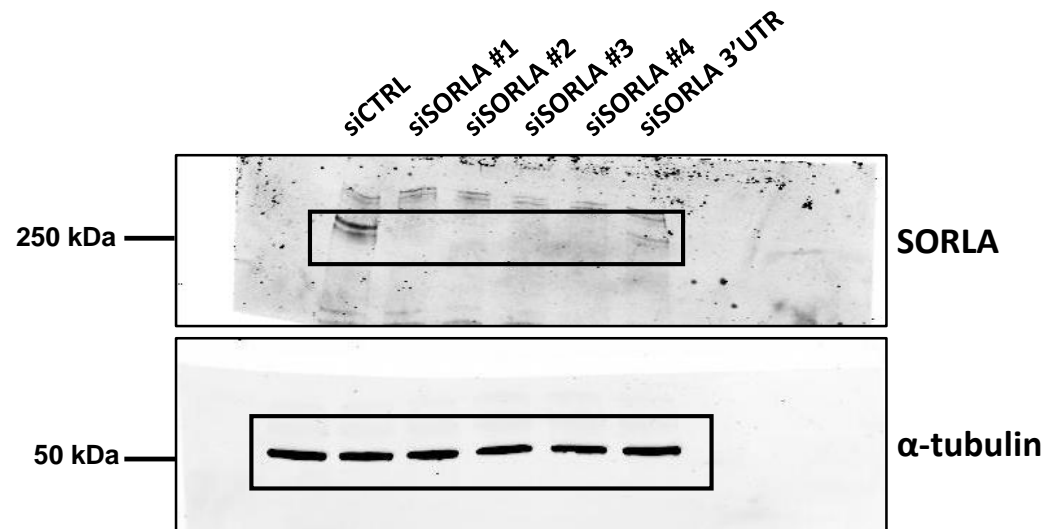

Supplementary Figure 3f

JIMT-1

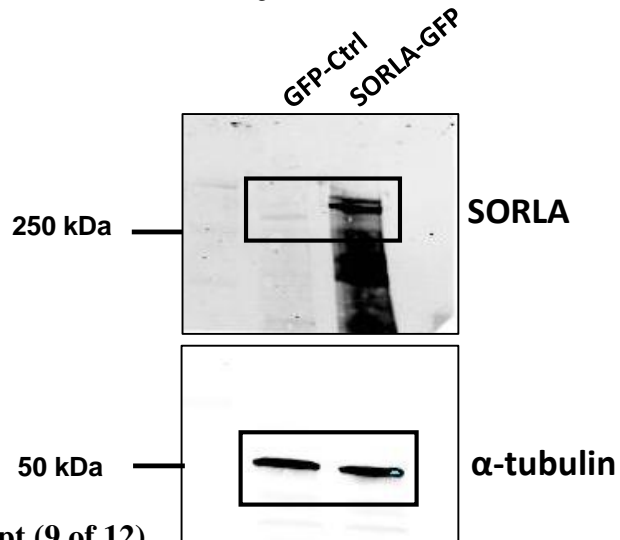

Supplementary Figure 3h

MDA-MB-361

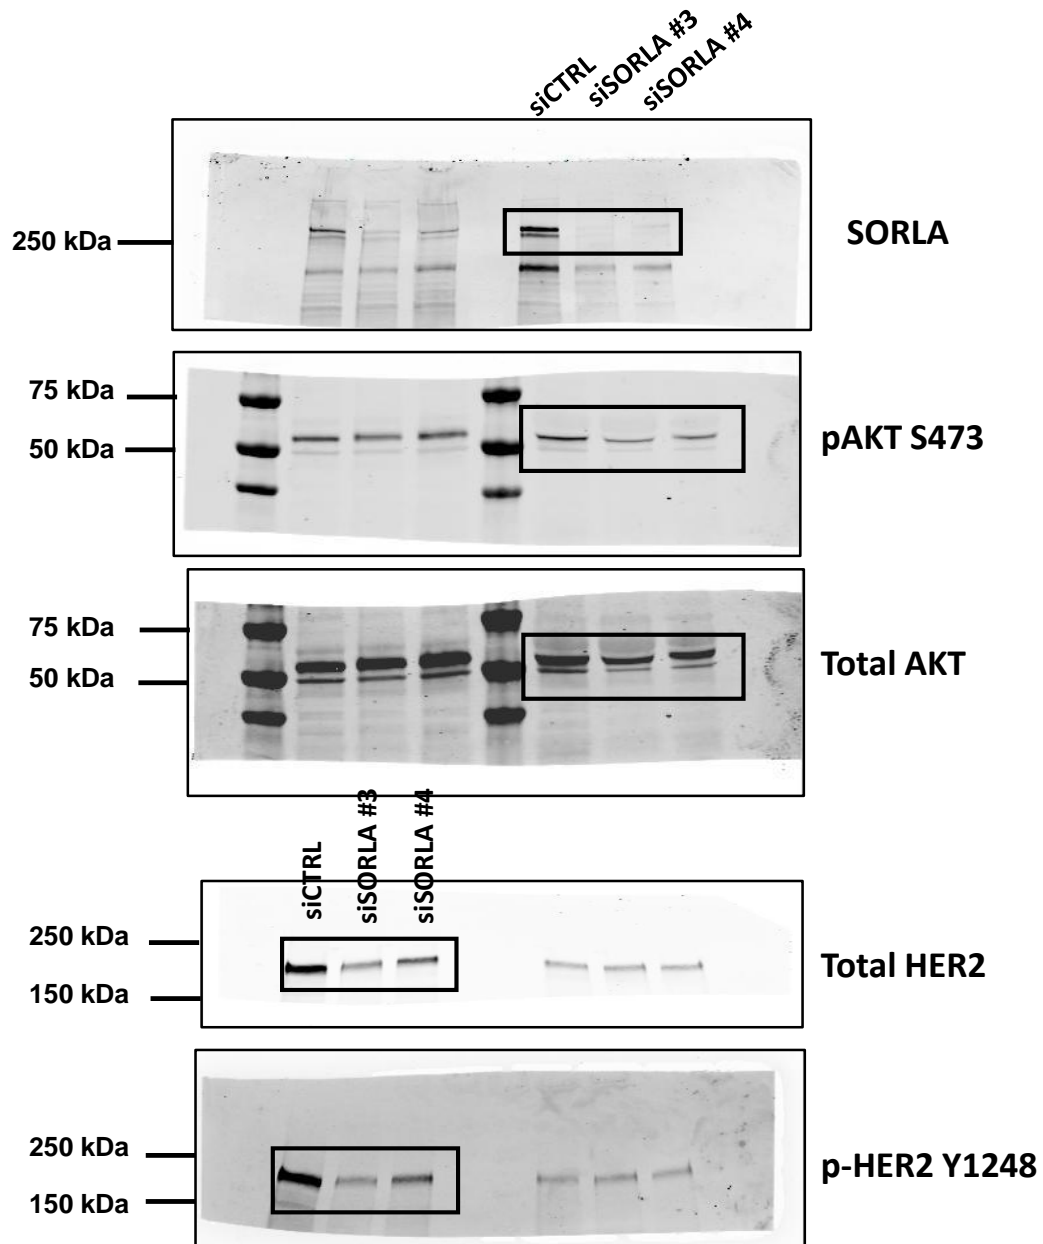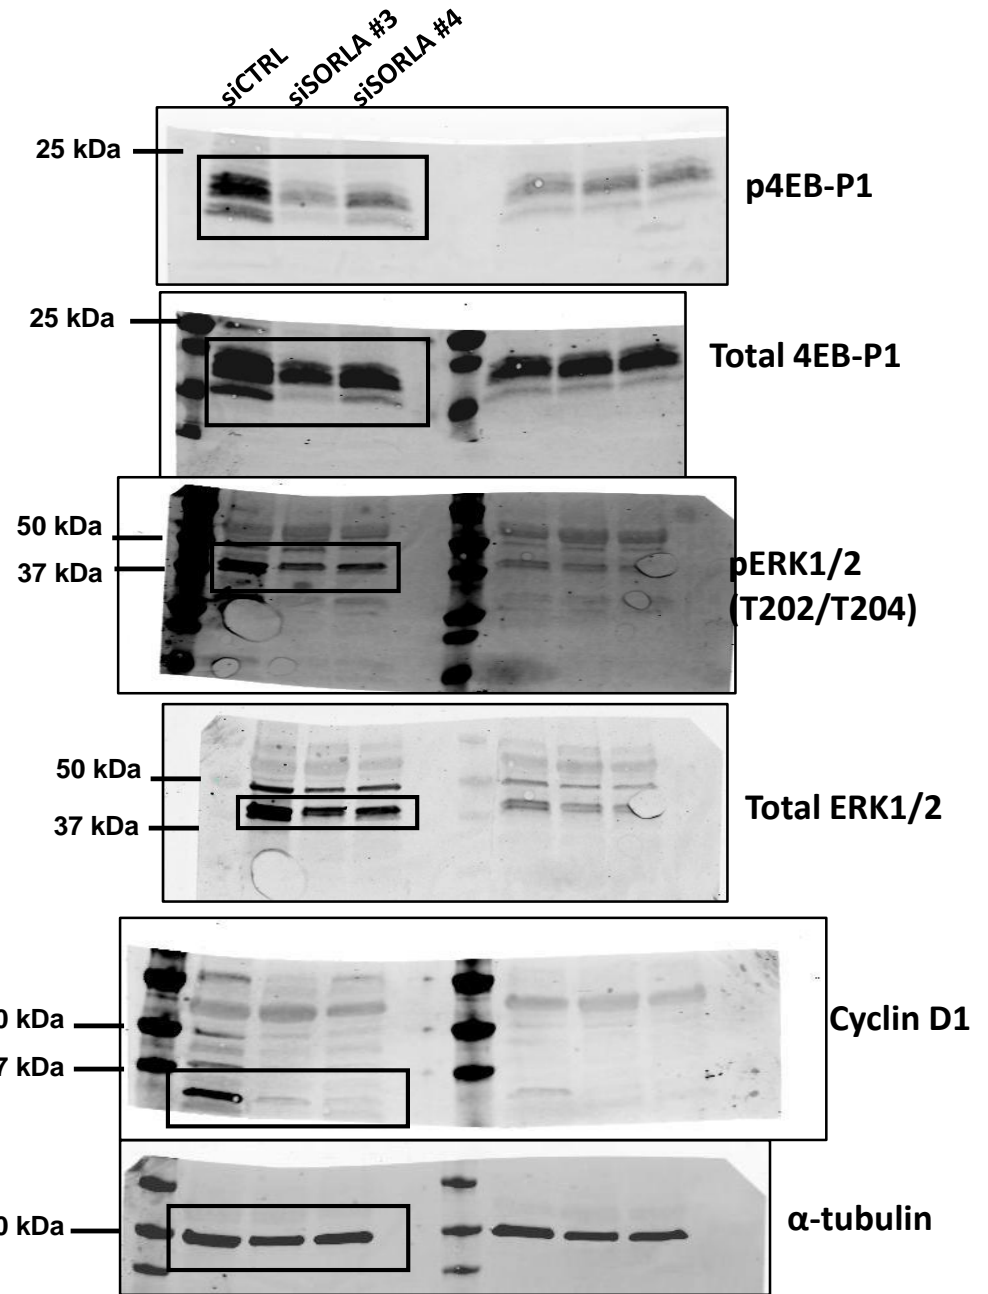

### Supplementary Figure 3i

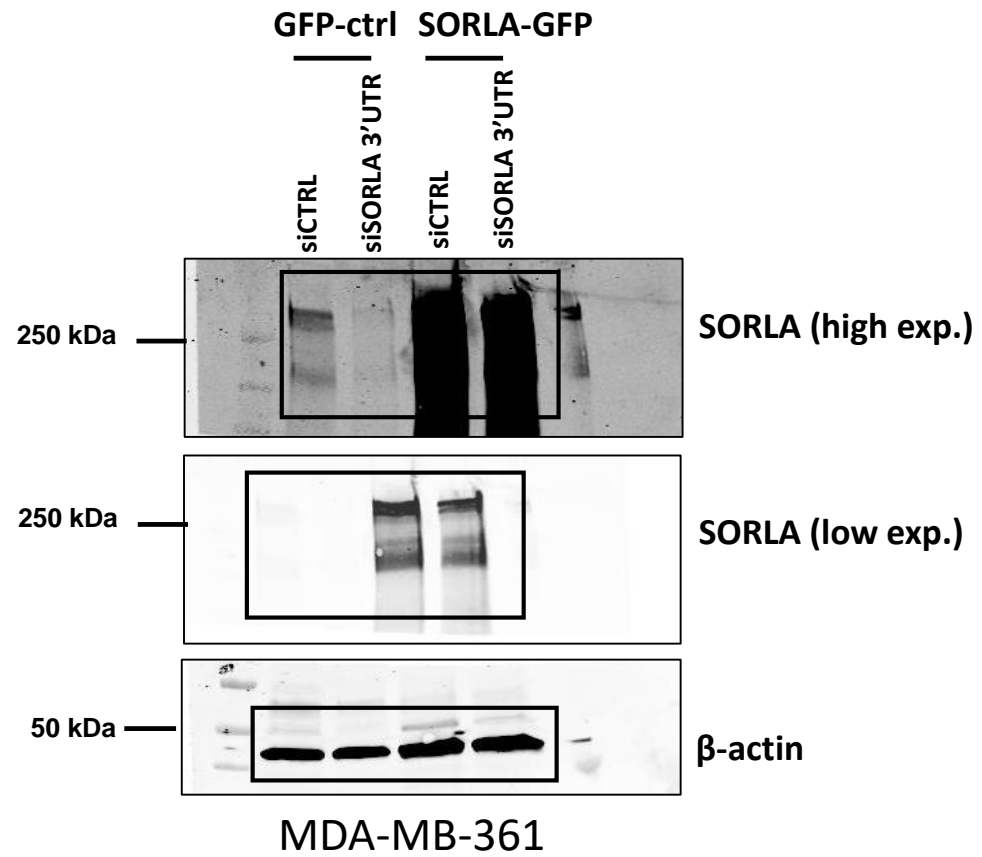

Supplementary Figure 5a

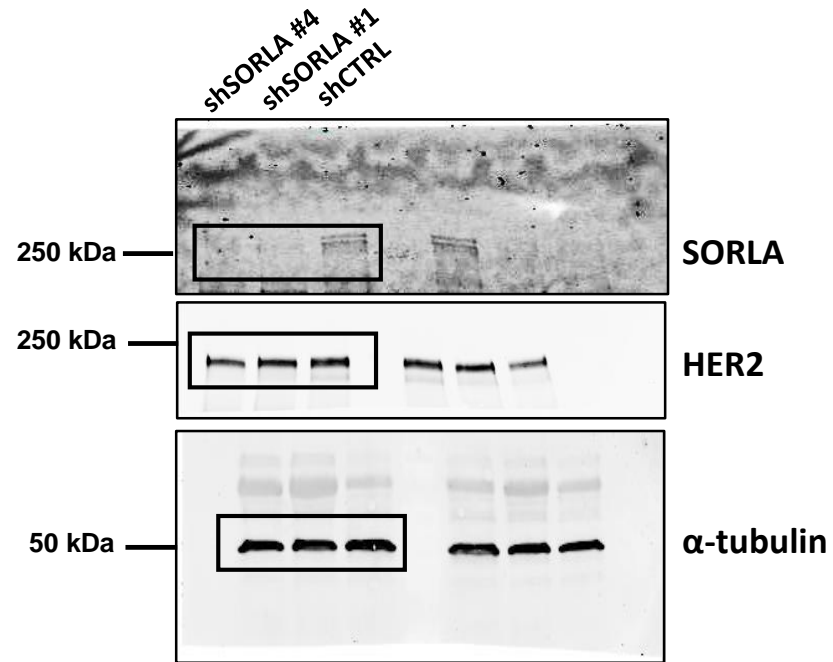

Supplementary Figure 6b

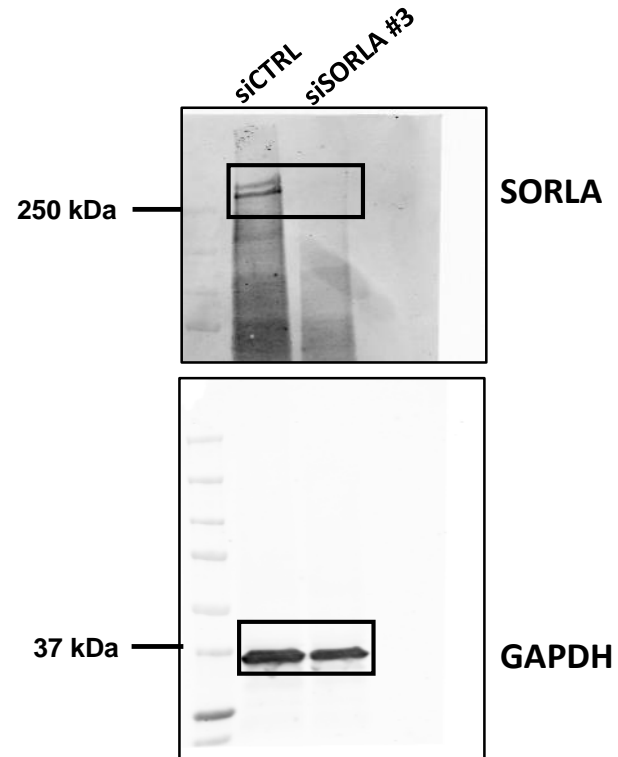

Supplementary Figure 6c

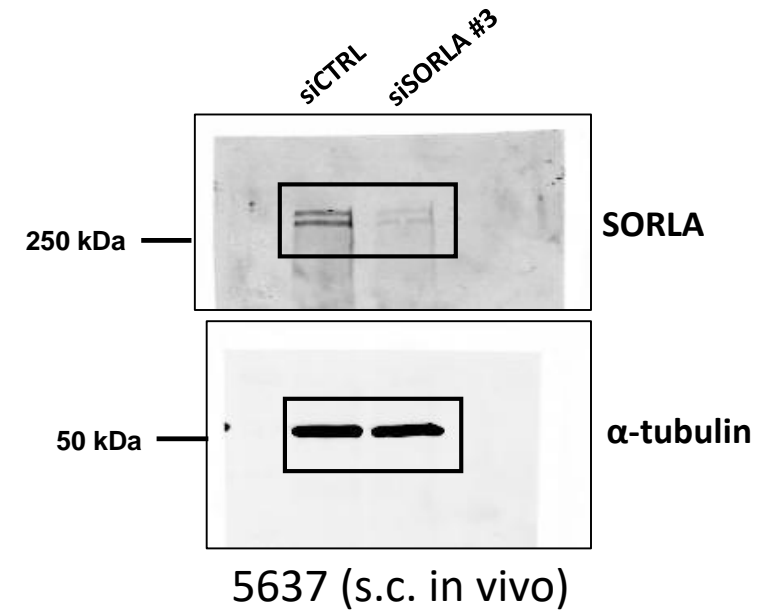

Figure 1b and Supplementary Figure 1e

MDA-MB-361 cells

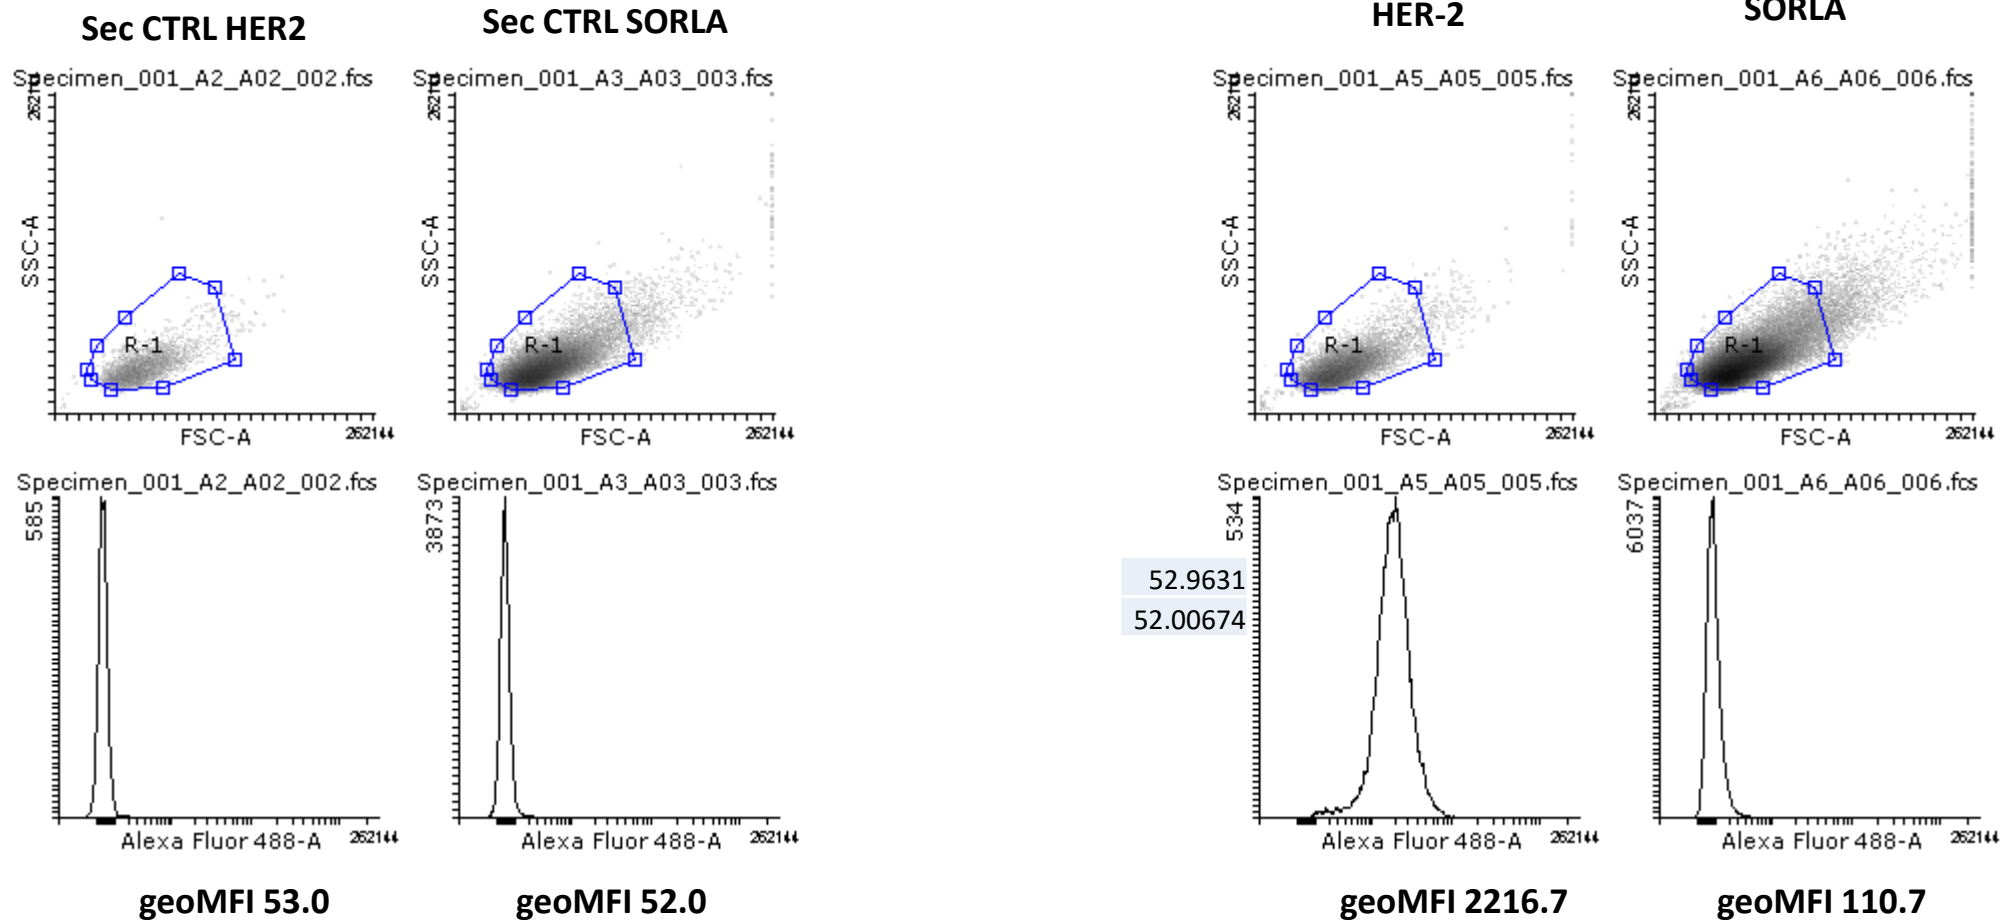

Supplementary Figure 8. Representative raw flow cytometry data and gating (1 of 7)

Figure 1b and Supplementary Figure 1e

BT474 cells

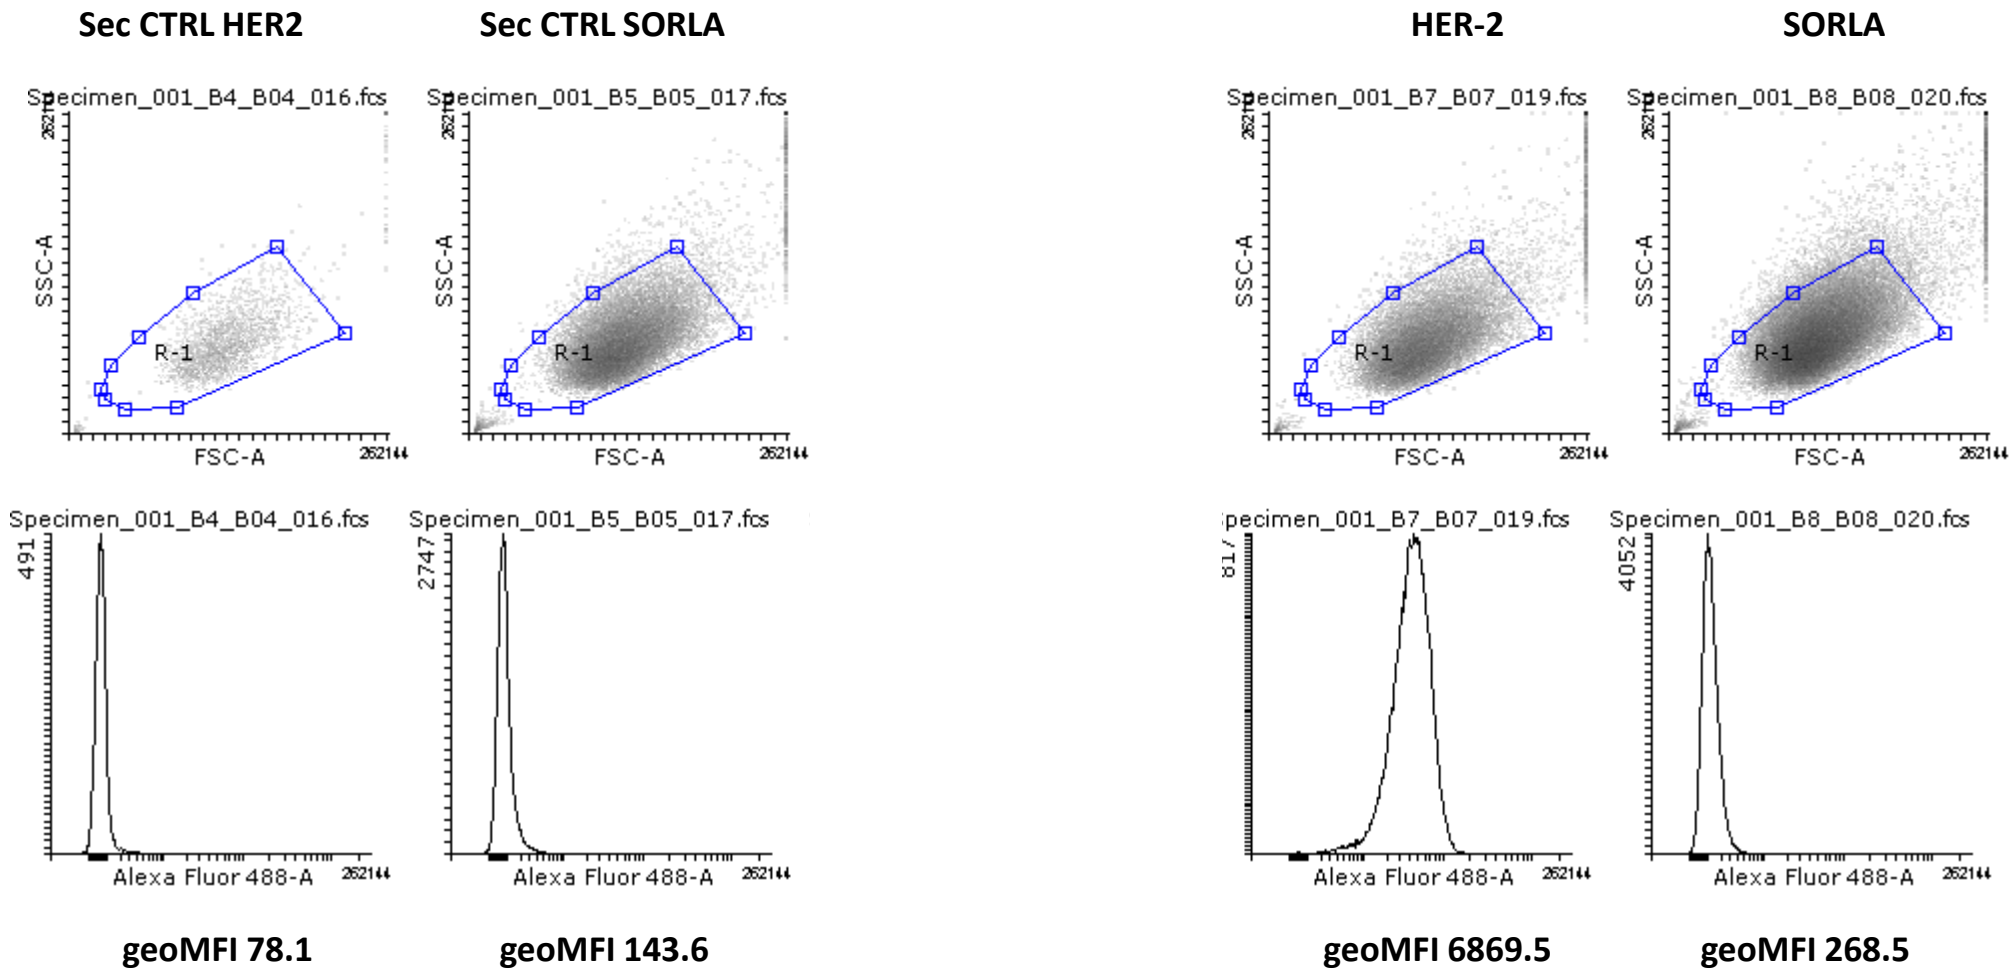

Supplementary Figure 8. Representative raw flow cytometry data and gating (2 of 7)

Figure 1b and Supplementary Figure 1e

JIMT-1 cells

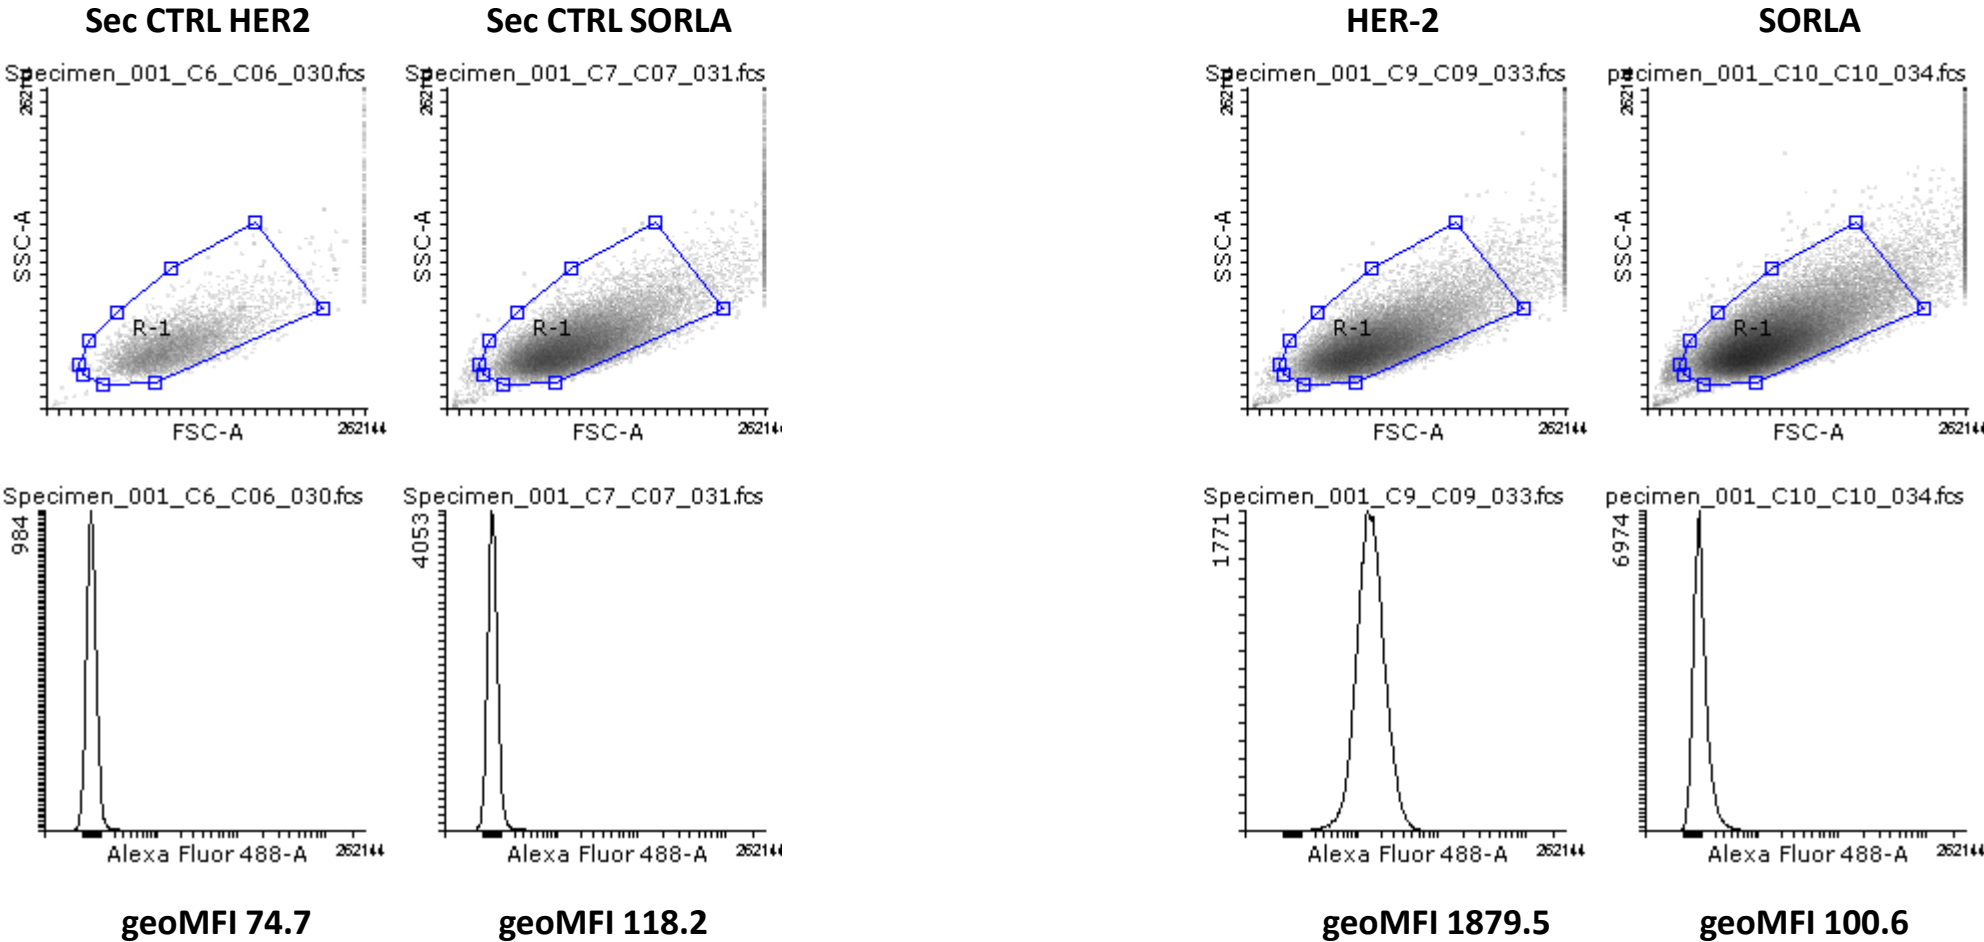

Supplementary Figure 8. Representative raw flow cytometry data and gating (3 of 7)



Secondary control

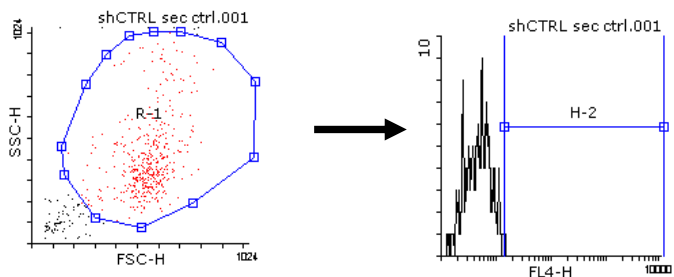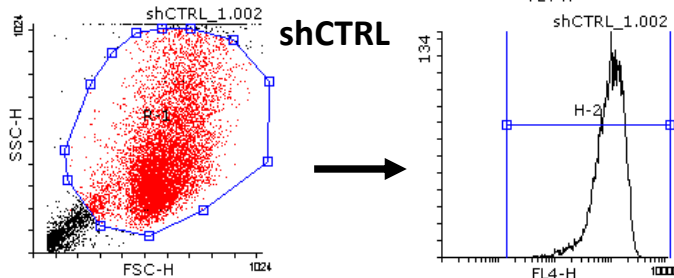

shSORLA #1

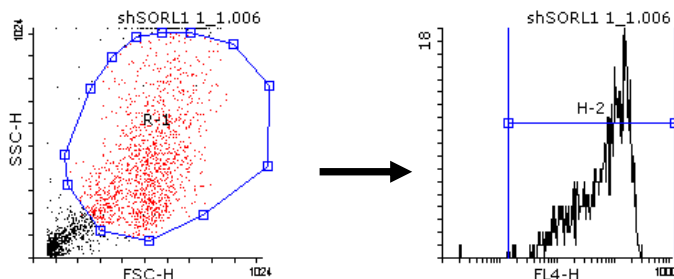

shSORLA #4

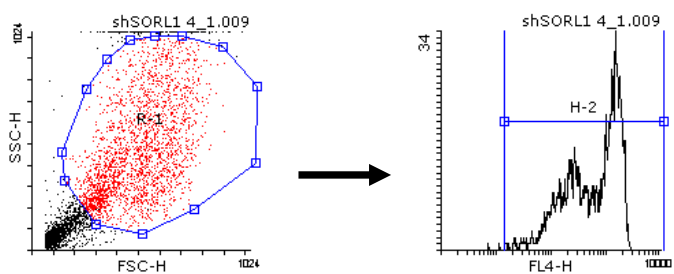

Secondary control

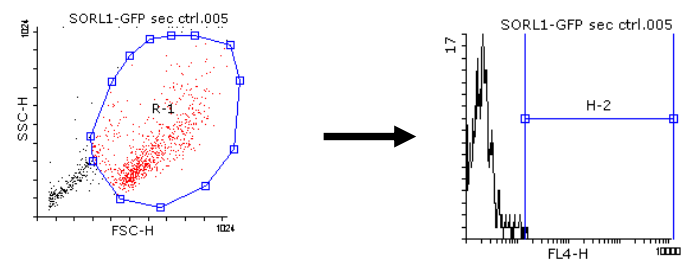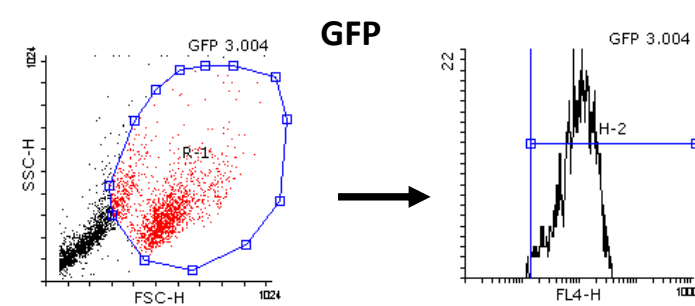

SORLA-GFP

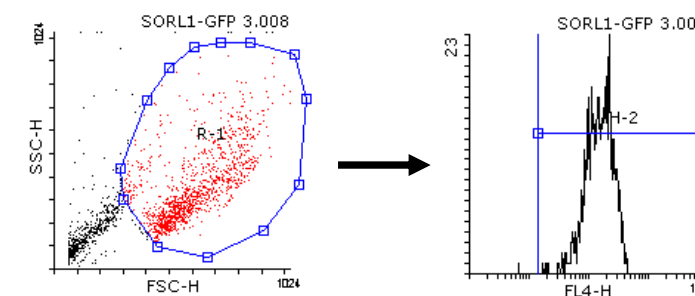

X axis (FL4-H) = HER2 signal

Secondary control

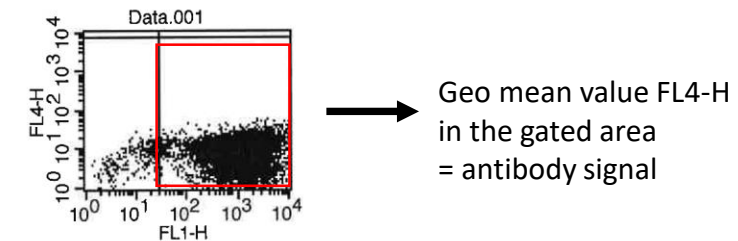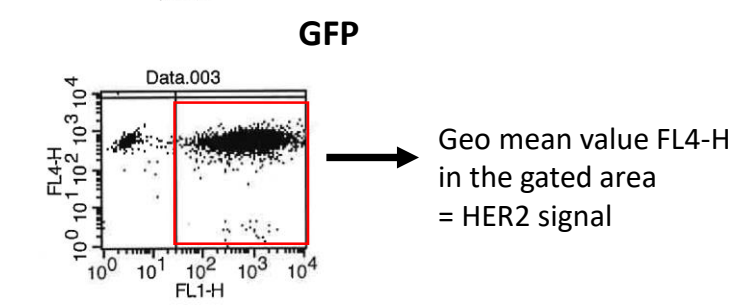

SORLA-GFP

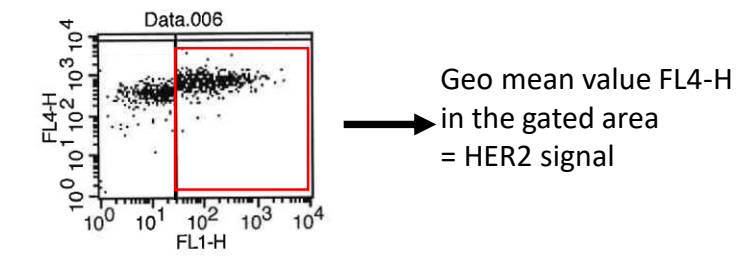

X axis (FL1-H) = GFP signal

Y axis (FL4-H) = Antibody/HER2 signal

Supplementary Figure 8. Representative raw flow cytometry data and gating (4 of 7)

Figure 4f

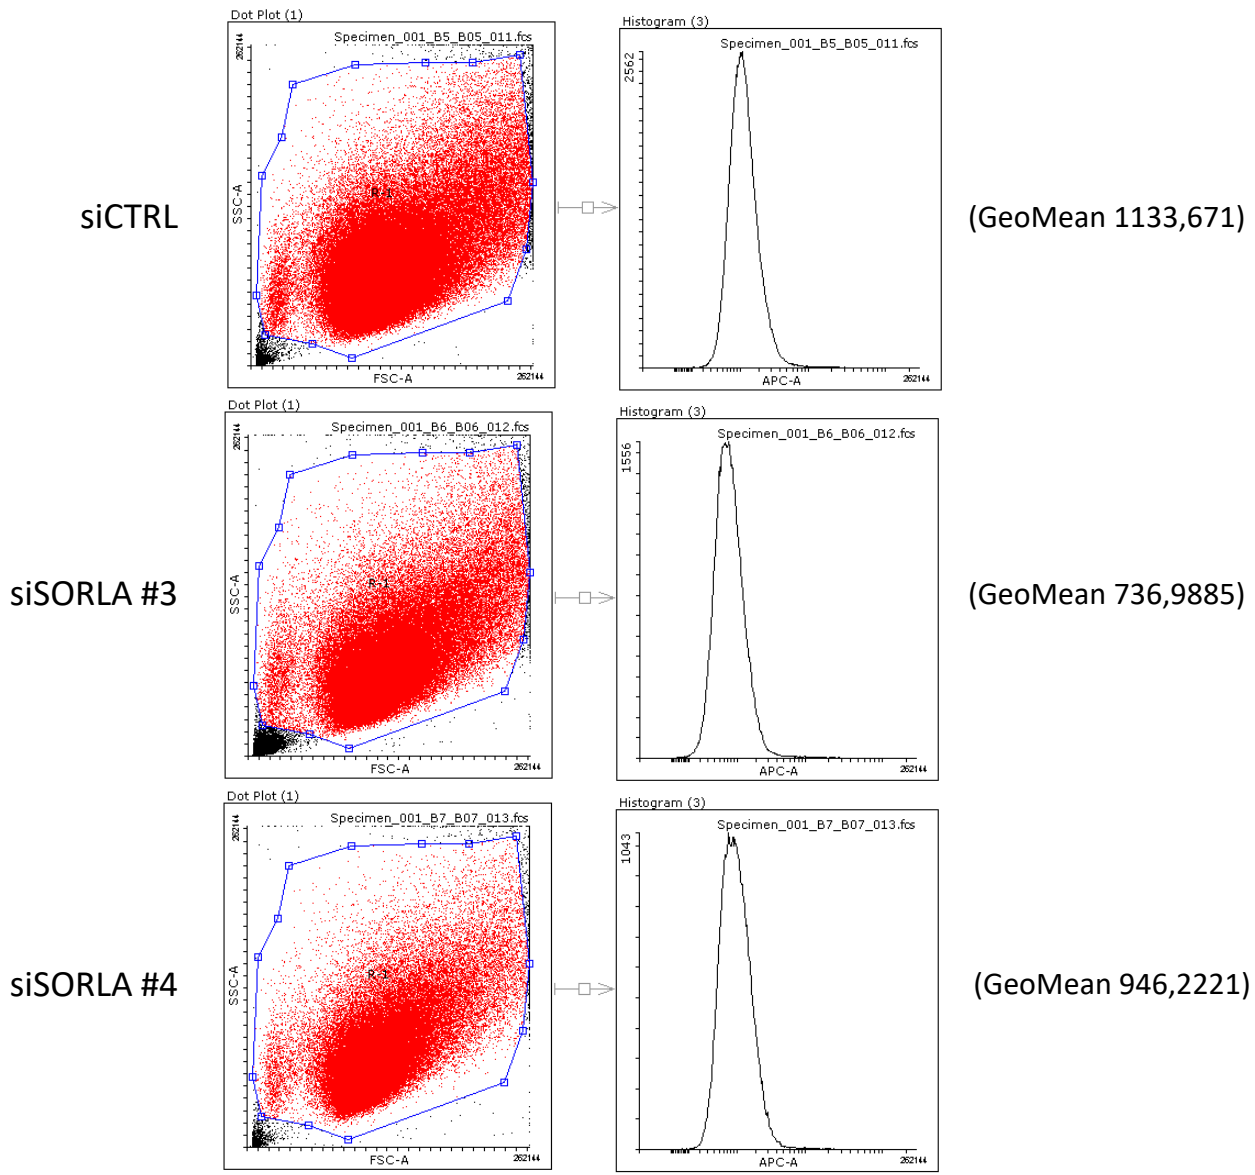

Supplementary Figure 8. Representative raw flow cytometry data and gating (5 of 7)

Supplementary Figure 3b

Secondary control

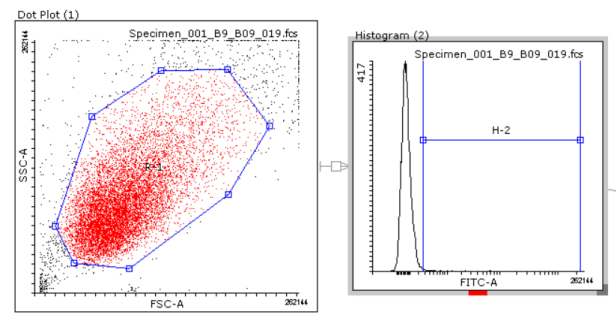

X axis (FITC:488) = ITGB1 signal

siCTRL

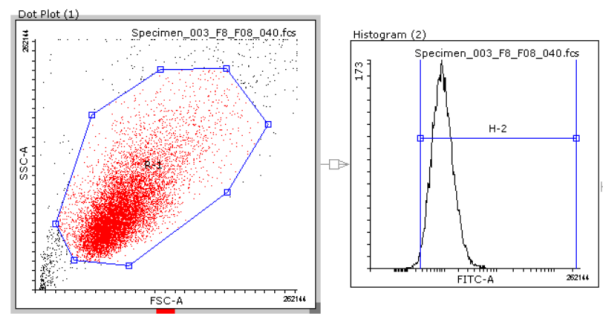

siSORL#4

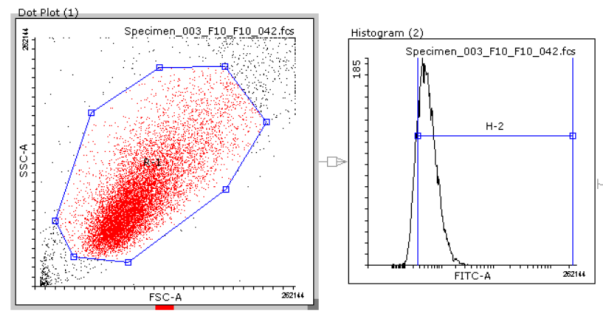

siSORL#3

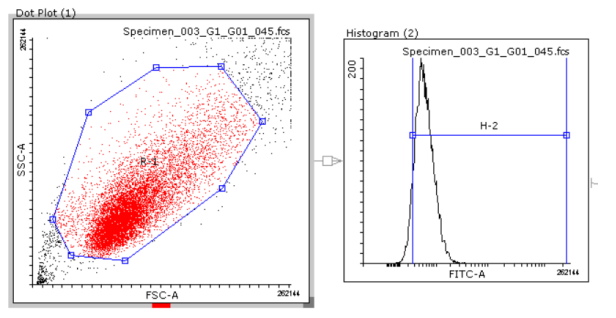

5637

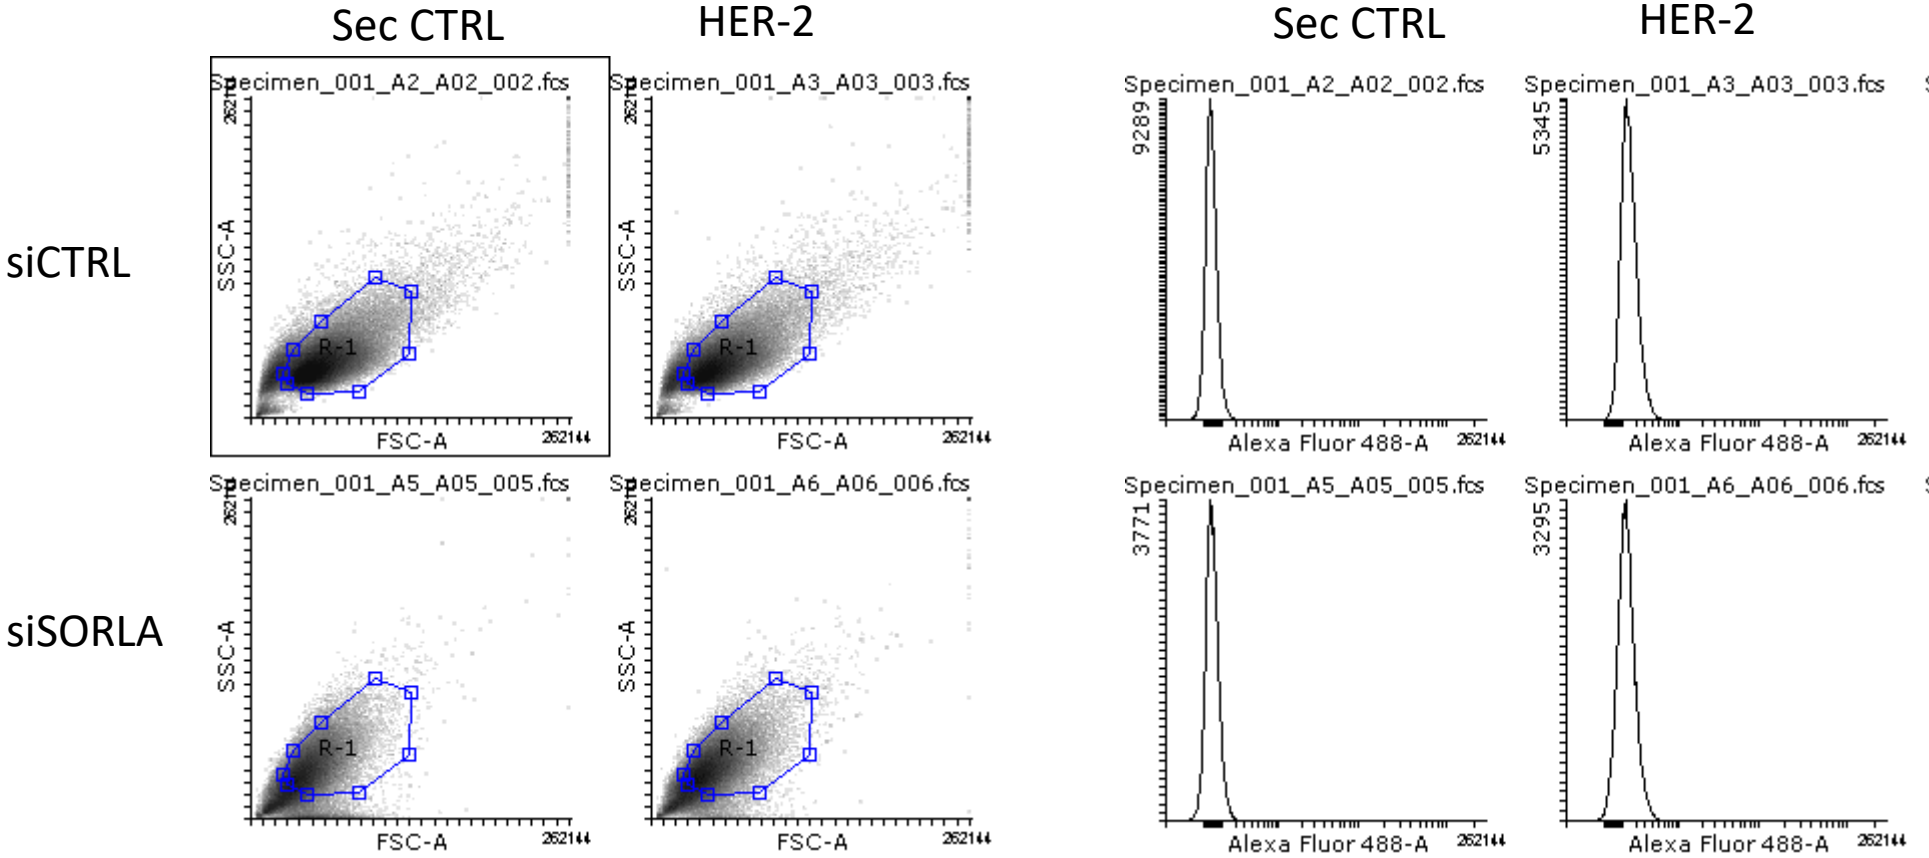

Supplementary Figure 8. Representative raw flow cytometry data and gating (7 of 7)

| Antibody                               | Manufacturer                | Catalogue No.   | Application | Dilution                 |
|----------------------------------------|-----------------------------|-----------------|-------------|--------------------------|
| HER2/ErbB2 (e2-4001 + 3B5)             | Thermo Scientific           | MA5-14057       | WB          | 1:1000                   |
|                                        |                             |                 | IP          | 2 µg/ml                  |
| ErbB2 (9G6)                            | Abcam                       | Ab16899         | FACS        | 1:300                    |
| HER2/neu                               | Ventana                     | clone 4B5       | IHC         | Ready to use (6 µg/ml)   |
| EGFR                                   | Ventana                     | Clone 5B7       | IHC         | Ready to use (0.4 µg/ml) |
| SORLA                                  | C.M. Petersen<br>(Aarhus U) |                 | IF          | 1:200                    |
| SORLA                                  | J. Gliemann<br>(Aarhus U)   | Goat polyclonal | IP/FACS     | 1 µg/1:200               |
| SORL1 (histological staining)          | Atlas Antibodies            | HPA031321       | IHC         | 1:300                    |
| LR11 (SORL1)                           | BD Transduction<br>Lab      | 612633          | WB          | 1:1000                   |
| p-AKT (S473)                           | CST                         | #9271S          | WB          | 1:1000                   |
| p-AKT (T308)                           | CST                         | 9275S           | WB          | 1:1000                   |
| Total AKT                              | CST                         | #9272           | WB          | 1:1000                   |
| LAMP-1                                 | Santa Cruz                  | SC-20011 (H4A3) | IF          | 1:50                     |
| EEA-1                                  | Santa Cruz                  | sc-6415         | IF          | 1:50                     |
| VPS35                                  | Abcam                       | ab10099         | IF          | 1:250                    |
| p4E-BP1 (T37/46)                       | CST                         | 2855S           | WB          | 1:1000                   |
| Total 4E-BP1                           | CST                         | 9452S           | WB          | 1:1000                   |
| phospho-ERK p-p44/42 MAPK<br>T202/Y204 | CST                         | 4370S           | WB          | 1:1000                   |
| Total ERK p44/p42 MAPK                 | CST                         | 9102S           | WB          | 1:1000                   |

|                            |                |                                         |                                      |                                                    |
|----------------------------|----------------|-----------------------------------------|--------------------------------------|----------------------------------------------------|
| GAPDH                      | HyTest         | 5G4MaB6C5                               | WB                                   | 1:500                                              |
| $\alpha$ -tubulin          | Hybridoma bank | Identifier: 12g10<br>anti-alpha-tubulin | WB                                   | 1:1000                                             |
| Histone H3                 | CST            | 4499                                    | WB                                   | 1:2000                                             |
| $\beta$ -actin             | Sigma          | A1978                                   | WB                                   | 1:2500                                             |
| CD63                       | Hybridoma Bank | H5C6                                    | IF                                   | 1:300                                              |
| Cleaved PARP1 (E51)        | Abcam          | Ab32064                                 | WB                                   | 1:1000                                             |
| Cyclin D1 (72-13G)         | Santa cruz     | SC-450                                  | WB                                   | 1:1000                                             |
| Rab11 (D4F5)               | CST            | #5589                                   | IF                                   | 1:250                                              |
| PARP1 (H-250)              | Santa Cruz     | SC-7150                                 | WB                                   | 1:500                                              |
| Rab5 (C8B1)                | CST            | #3547                                   | IF                                   | 1:500                                              |
| (Her2) Trastuzumab         | Roche          | CAS-180288-69-1                         | Live-cell<br>imaging/IF<br><br>ELISA | 1:200 from<br>30ug/ml<br>stock<br><br>5 $\mu$ g/ml |
| c-erbB-2                   | Dako           | A0485                                   | ELISA                                | 5 $\mu$ g/ml                                       |
| 9EG7 ( $\beta$ 1-integrin) | BD             | 553715                                  | ELISA                                | 5 $\mu$ g/ml                                       |

**Supplementary Table 1. Antibodies and dilutions used in this study.**

| Oligonucleotide                                                    | SOURCE    | Catalogue No. |
|--------------------------------------------------------------------|-----------|---------------|
| ON-TARGETplus siRNA against SORLA #1<br>(CCAUGAAUAUCACAGCUUA)      | Dharmacon | J-004722-08   |
| ON-TARGETplus siRNA against SORLA #2<br>(GACAGGAGCUACAAAGUAA)      | Dharmacon | J-004722-06   |
| ON-TARGETplus siRNA against SORLA #3<br>(CCGAAGAGCUUGACUACUU)      | Dharmacon | J-004722-07   |
| ON-TARGETplus siRNA against SORLA #4<br>(CCACGUGUCUGCCCAAUUA)      | Dharmacon | J-004722-05   |
| siRNA against SORLA 3'UTR (sense strand:<br>GGUUGGAGUGCCAAUAGAATT) | Qiagen    | SI05039888    |
| ON-TARGETplus siRNA against HER2 #2<br>(UGGAAGAGAUCACAGGUUA)       | Dharmacon | J-003126-17   |
| ON-TARGETplus siRNA against HER2 #4<br>(GCUCAUCGCUCACAACCAA)       | Dharmacon | J-003126-20   |
| Allstars Neg. ctrl (siCTRL)                                        | Qiagen    | 1027281       |
| pGFP-C-shLenti shSORL1 #1<br>(GGACTGGTCTGATGAGAAGGATTGTGGAG)       | Origene   | TL309181A     |
| shSORL1 – GFP #4<br>(GTACATCTCTAGCAGTGCTGGAGCCAGGT)                | Origene   | TL309181C     |
| pGFP-C-shLenti Scramble (shCTRL)                                   | Origene   | TR30021       |

**Supplementary Table 2. Oligonucleotide sequences of siRNA and shRNA used in this study.**
