# Supplementary material for: SORLA regulates endosomal trafficking and oncogenic fitness of HER2
Source: PubMed Central journal article supplement (PMC6538630; doi:10.1038/s41467-019-10275-0), 2019-05-28
Supplement: 41467_2019_10275_MOESM3_ESM.pdf [file 41467_2019_10275_MOESM3_ESM.pdf]

## **Description of Additional Supplementary Files**

File Name: Supplementary Movie 1

Description: Live-cell TIRF plane imaging of SORLA-GFP and AlexaFluor-568-labeled trastuzumab (Tz-568; red) in MDA-MB-361 cells.

File Name: Supplementary Movie 2

Description: Live-cell confocal imaging of SORLA-GFP and AlexaFluor-568-labeled trastuzumab (Tz-568; red) in the cytoplasm of MDA-MB-361 cells.
